# Supplementary material
Source: publisher figshare collection journal article supplement (https://gsapubs.figshare.com/ndownloader/files/22411632)

# 05-LP-60C(20-30) alunite Age Spectrum

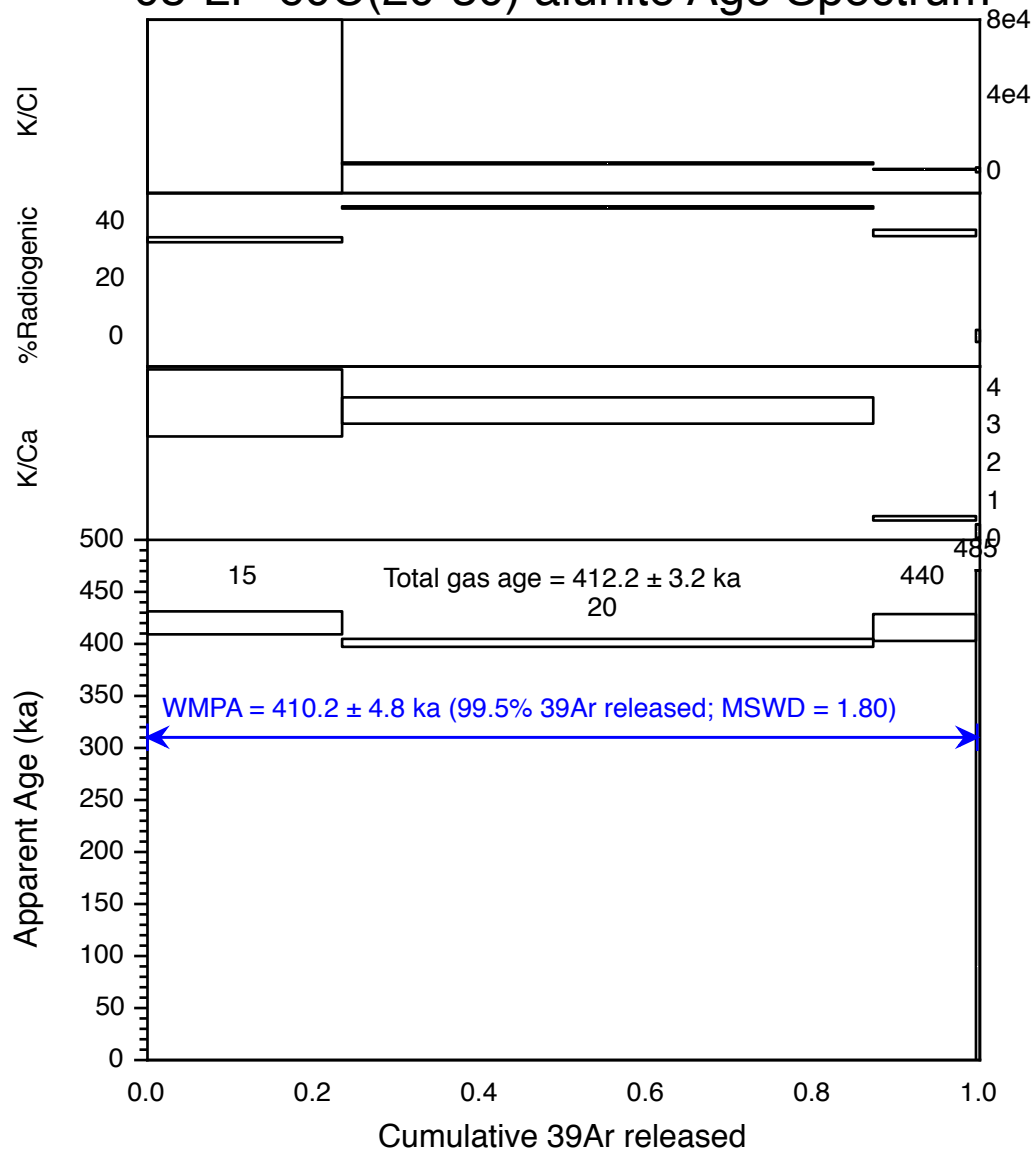

## 05-LP-60C(20-30) alunite Isochron

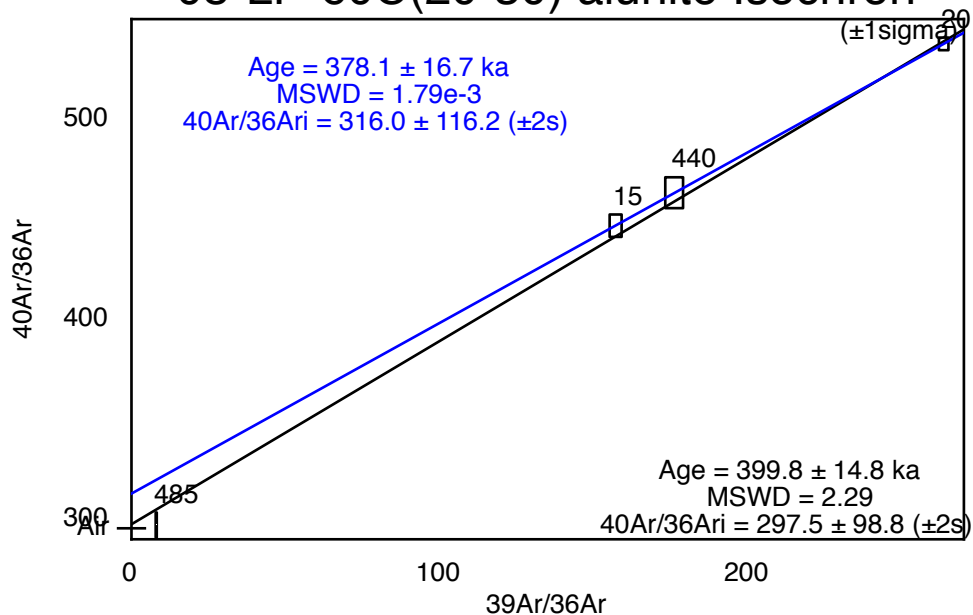

# 05-LP-60C(20-30) alunite Age Spectrum

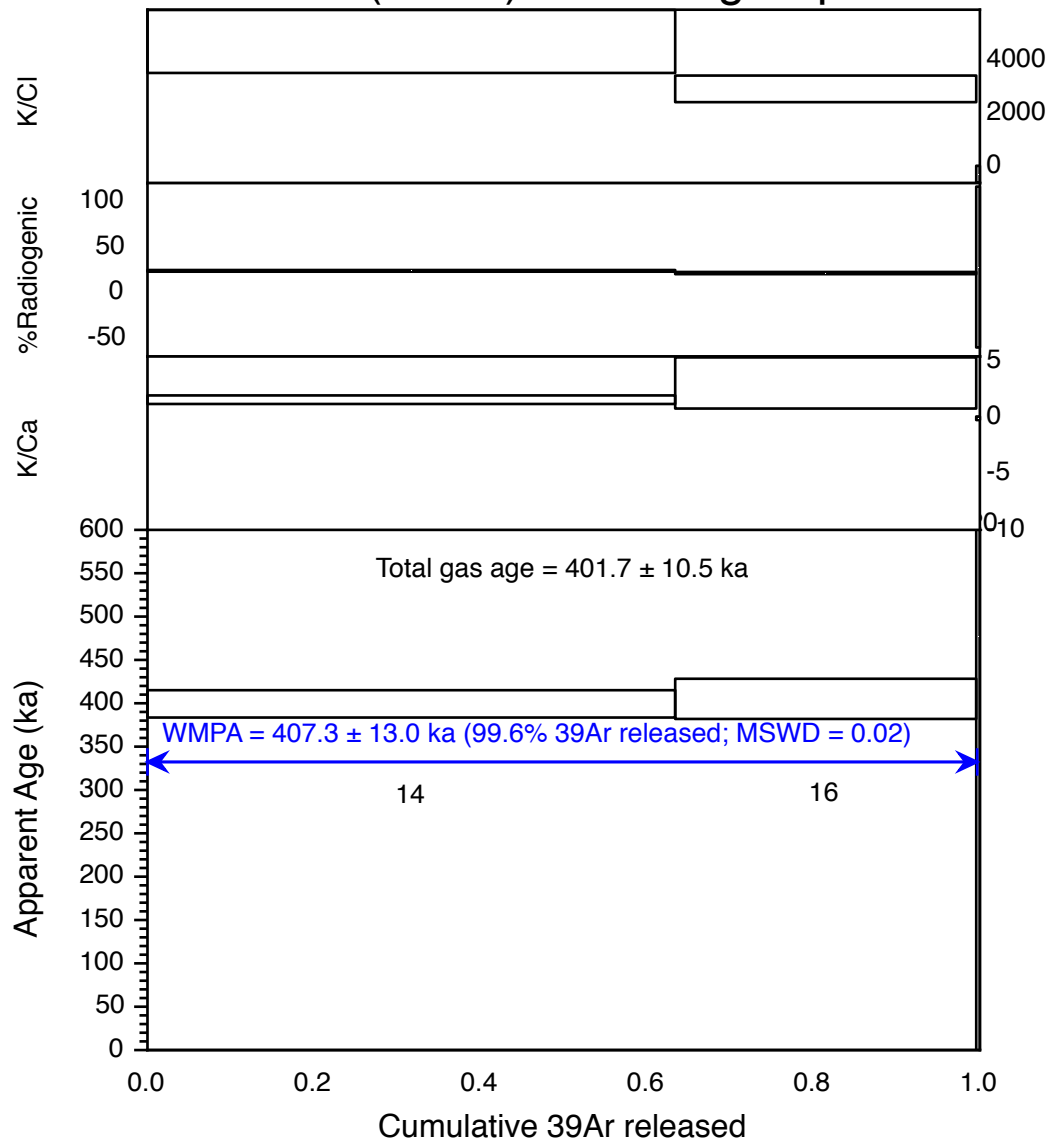

## 05-LP-60C(20-30) alunite Isochron

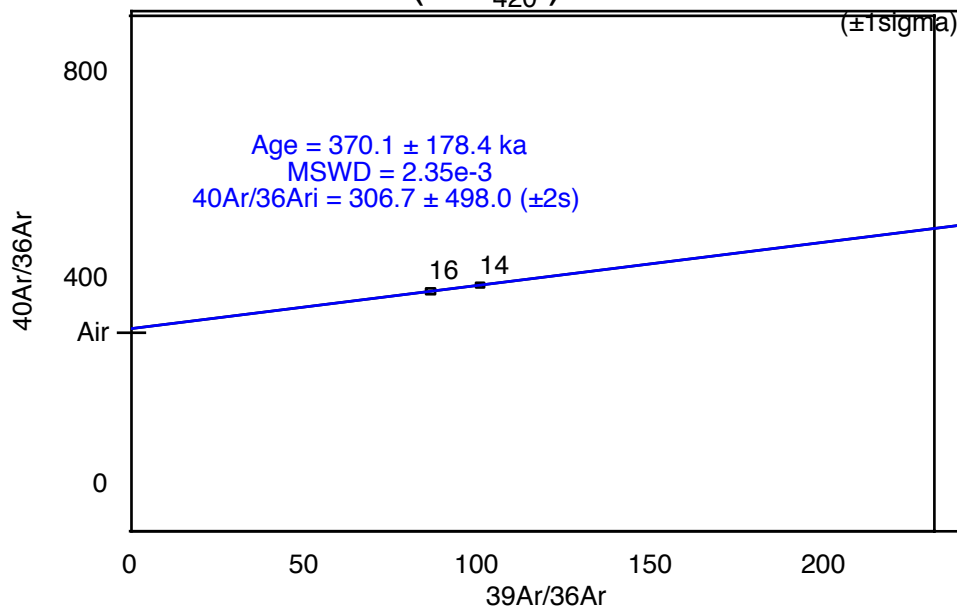

# 05-LP-93 alunite Age Spectrum

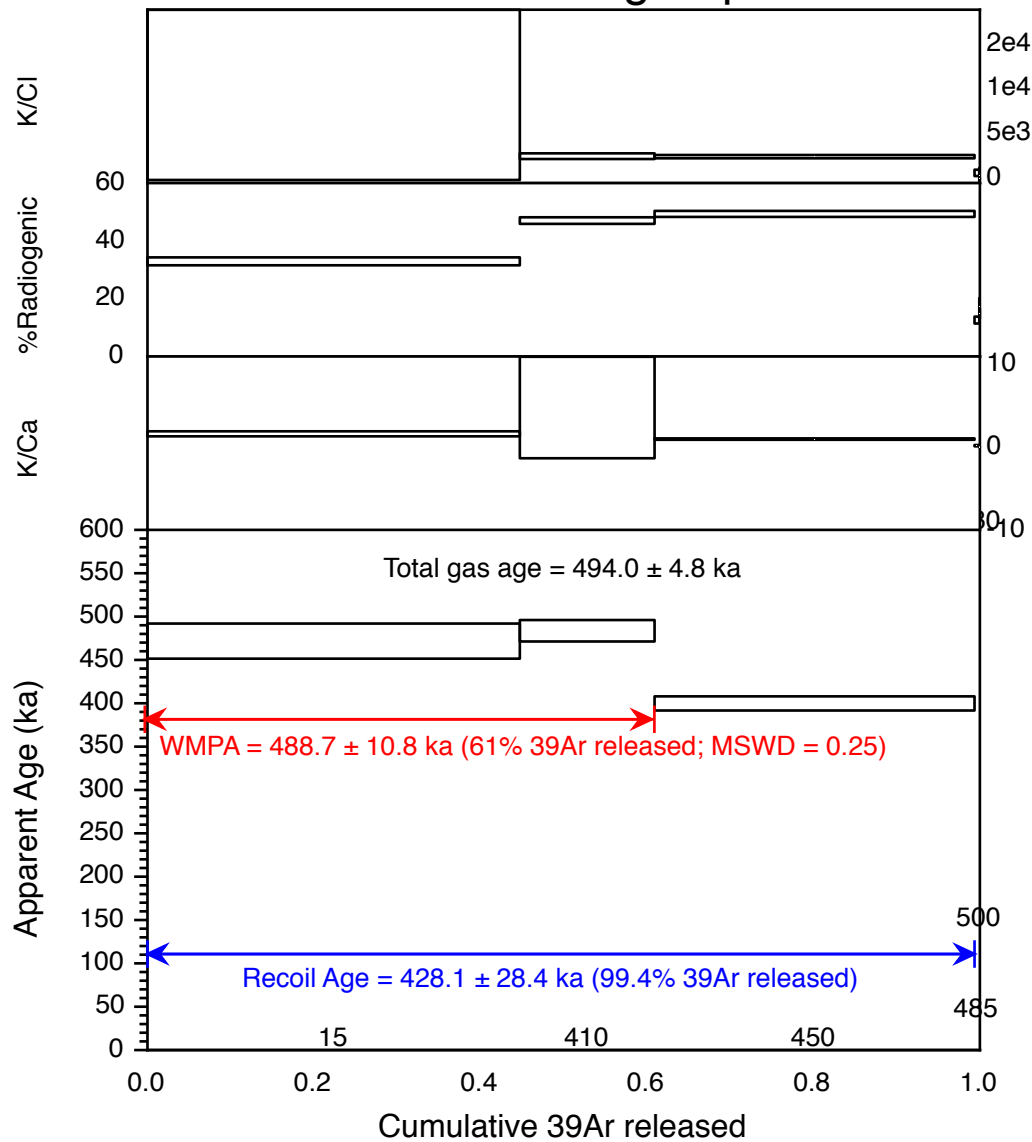

## 05-LP-93 alunite Isochron

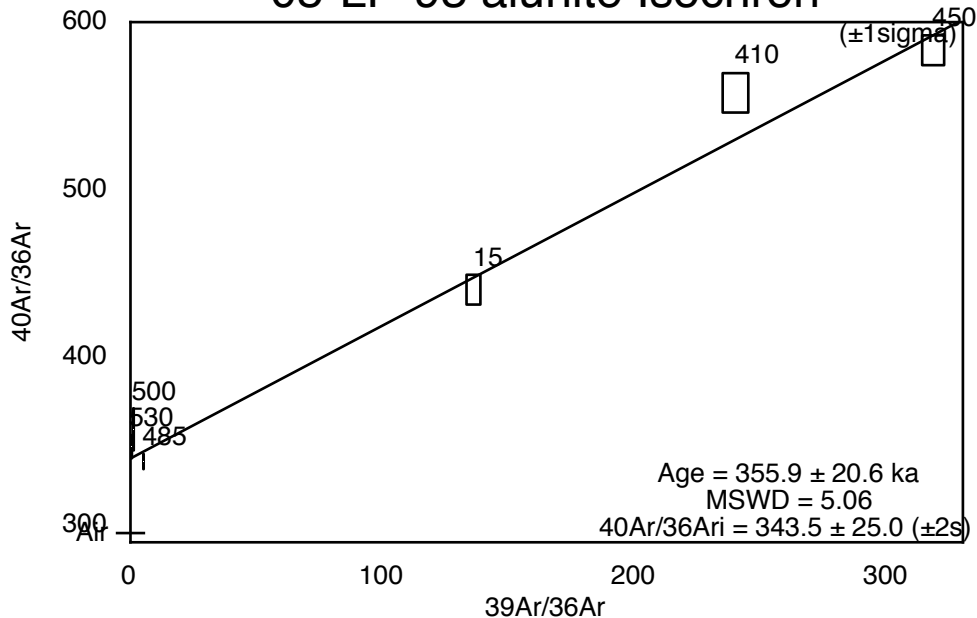

# 06LP34 Dacite Age Spectrum

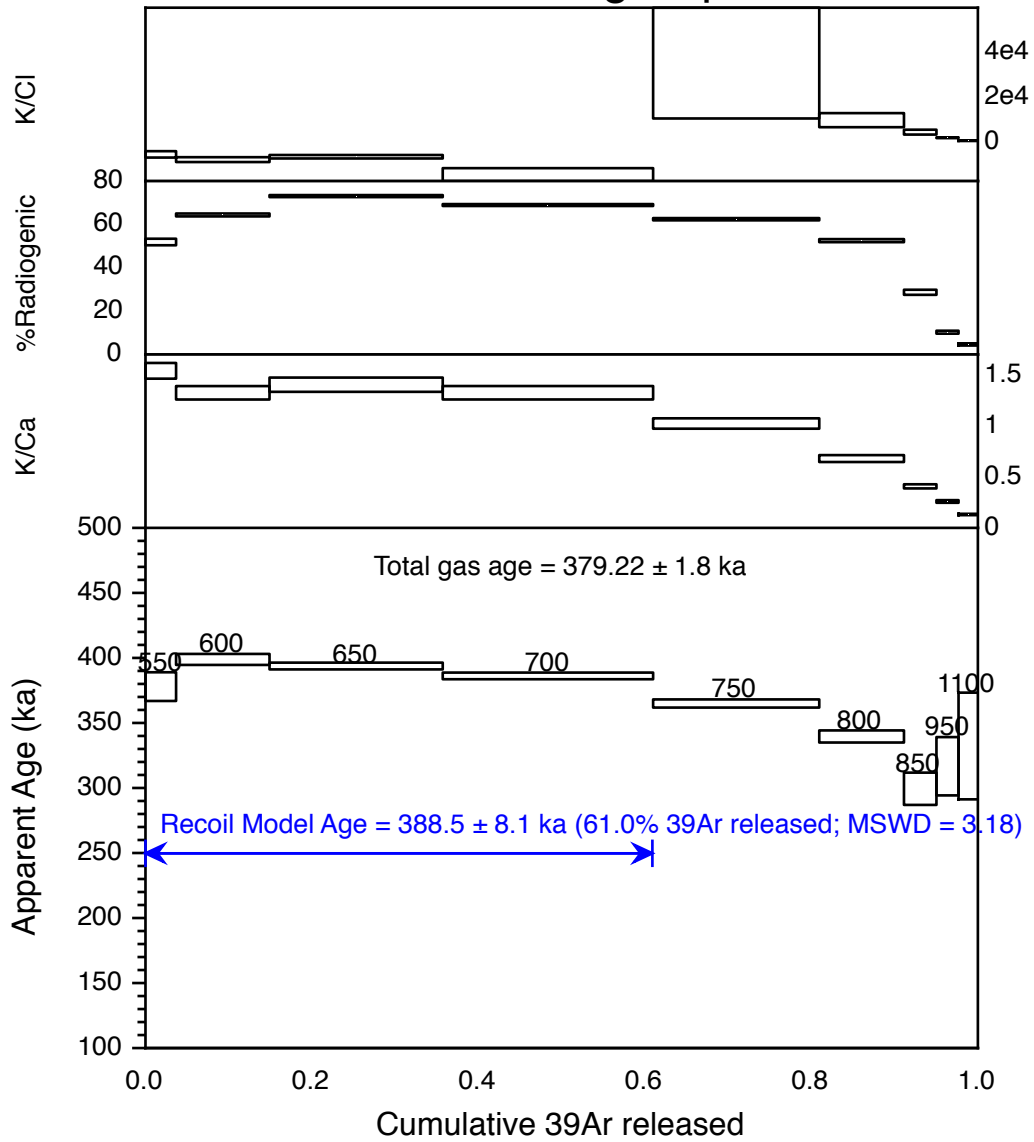

## 06LP34 Dacite Isochron

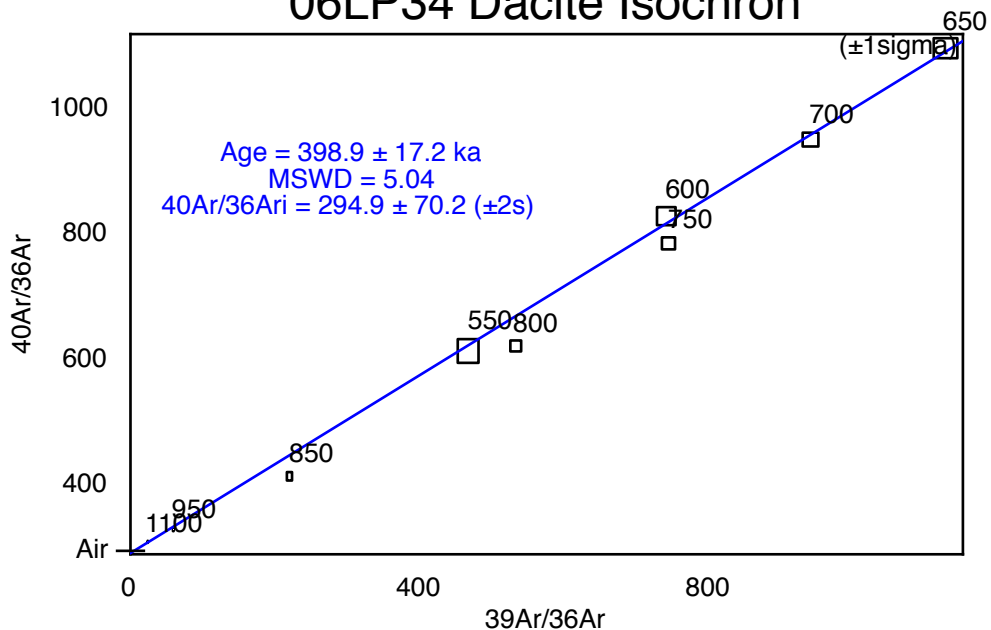

# 06LP36 Andesite Age Spectrum

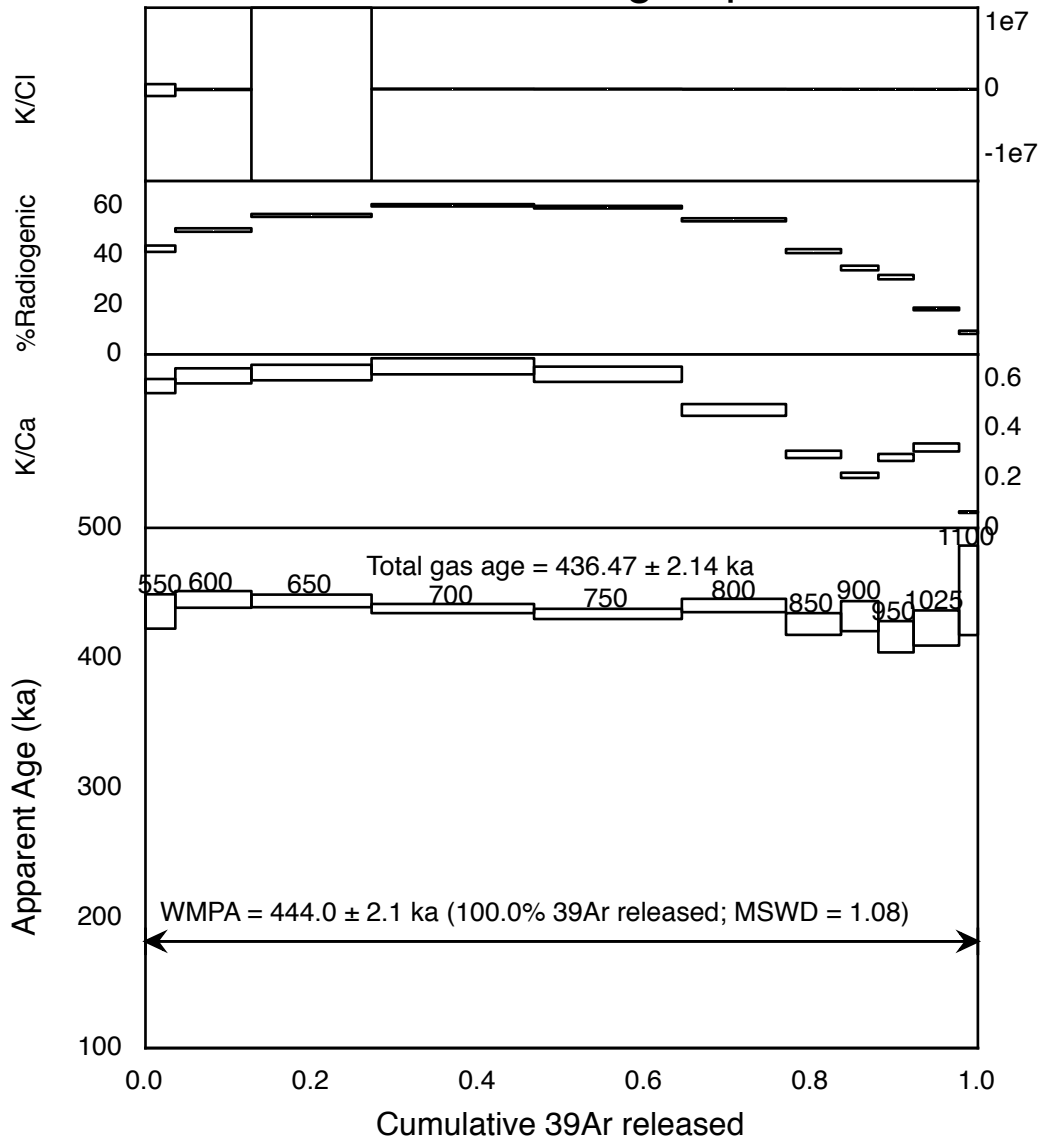

## 06LP36 Andesite Isochron

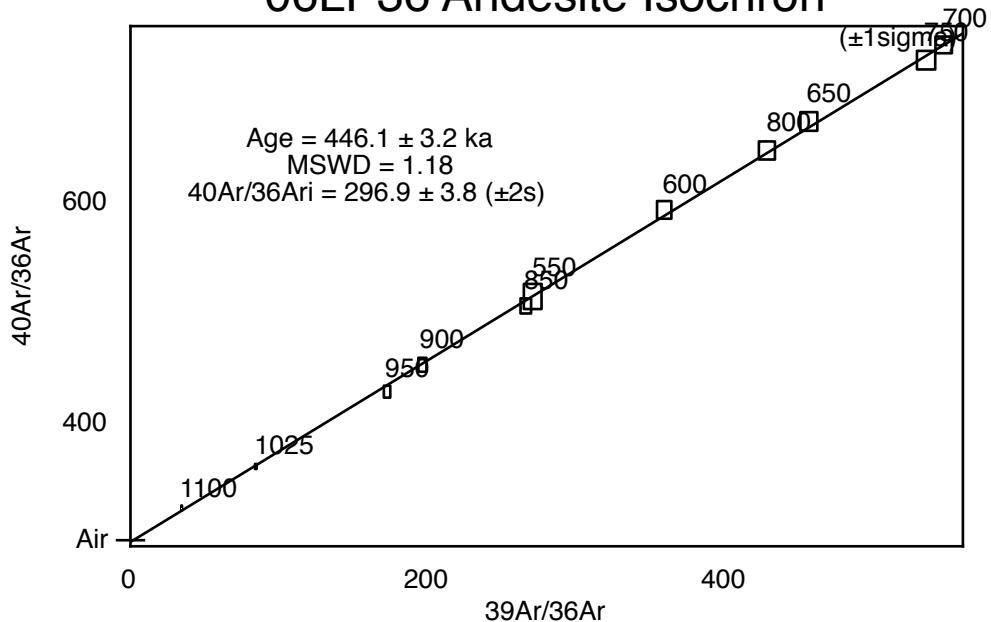

# 06LP40 Andesite Age Spectrum

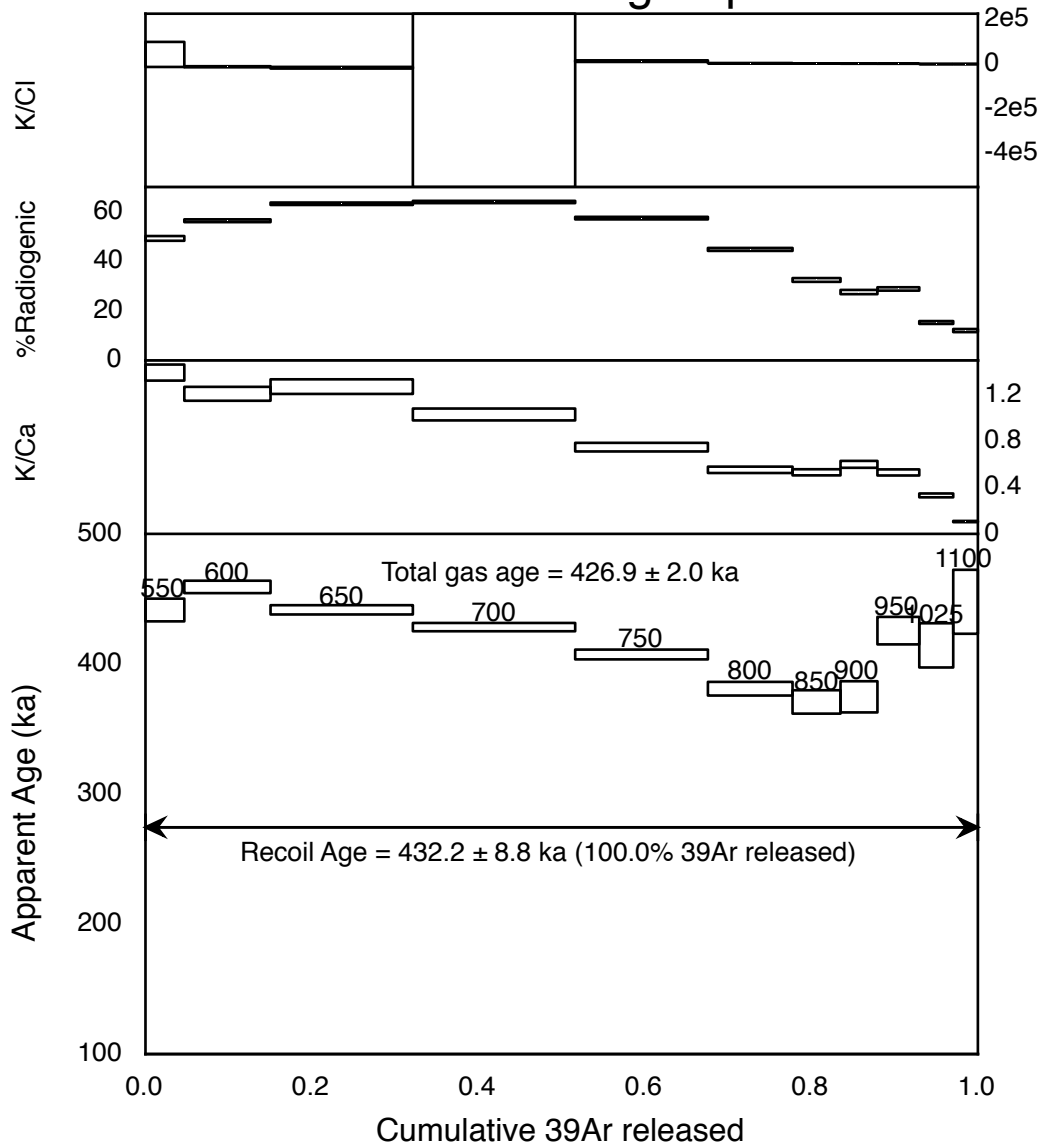

## 06LP40 Andesite Isochron

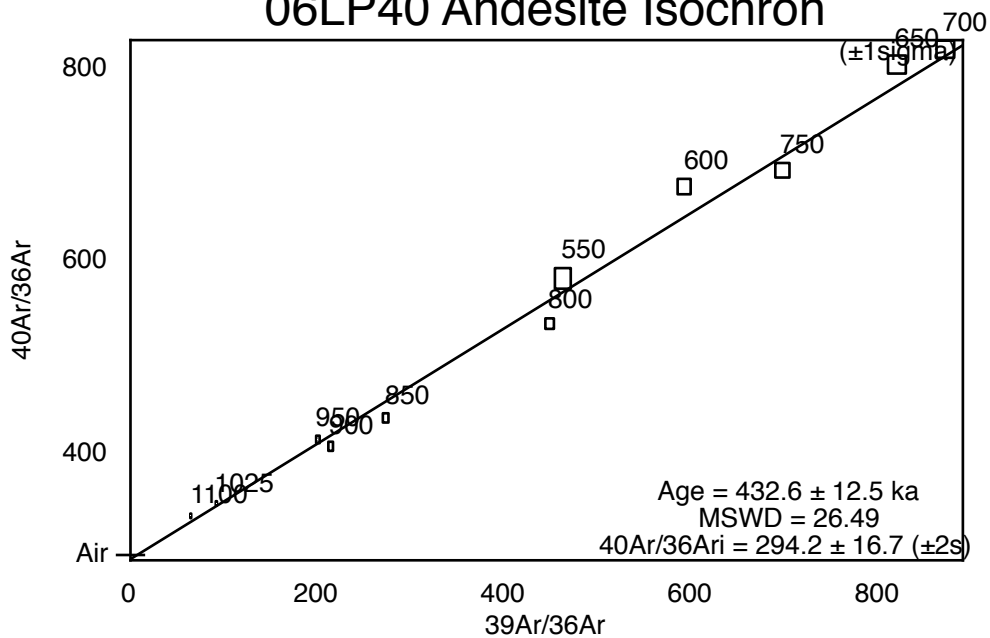

# 06LP41 Andesite Age Spectrum

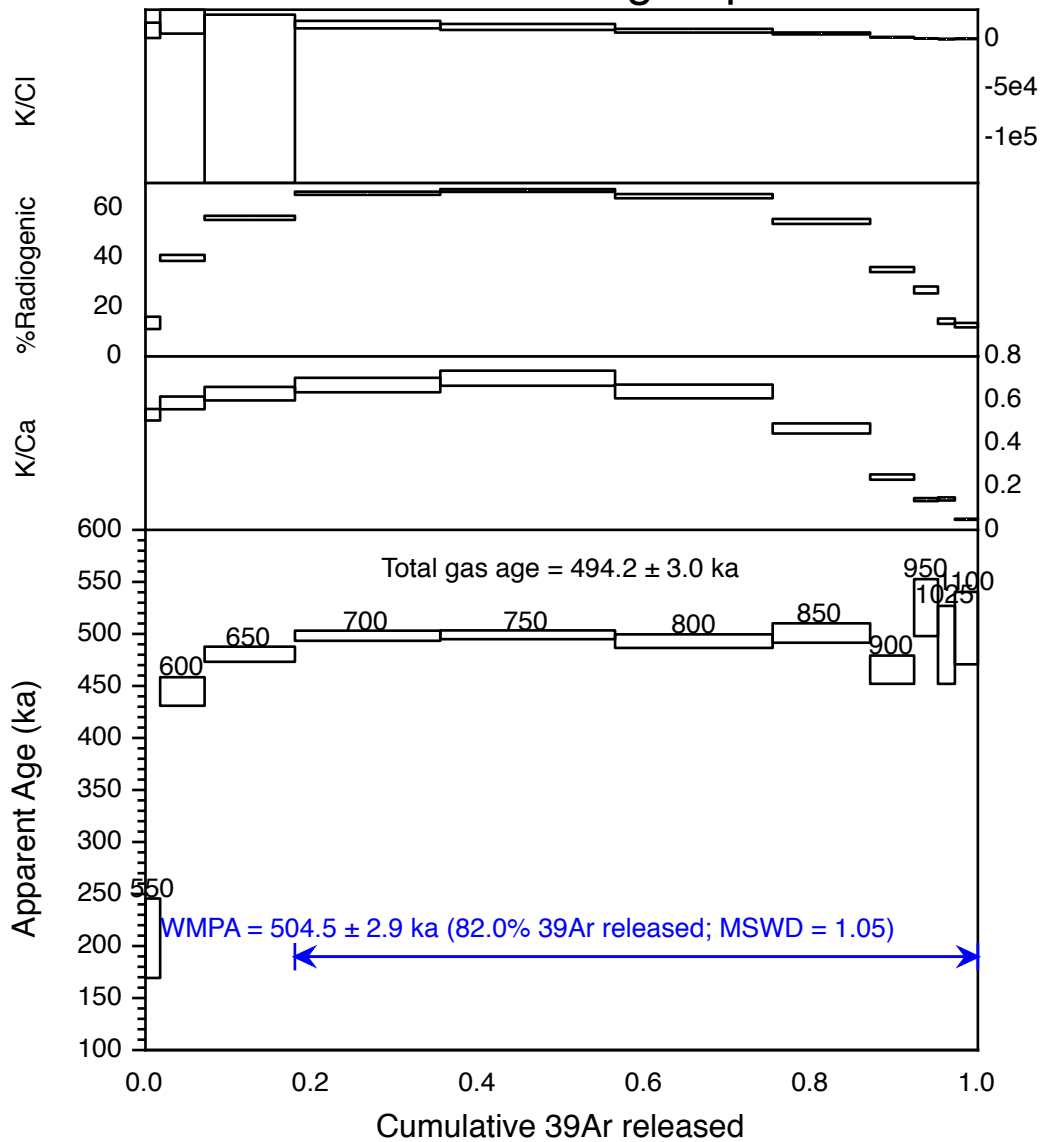

## 06LP41 Andesite Isochron

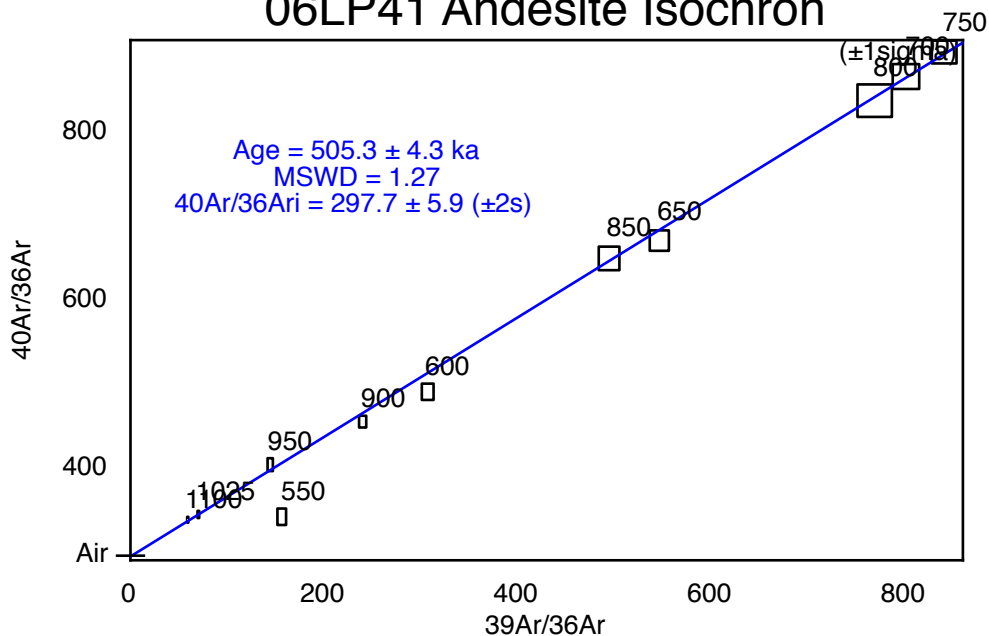

# 06LP42 Andesite Age Spectrum

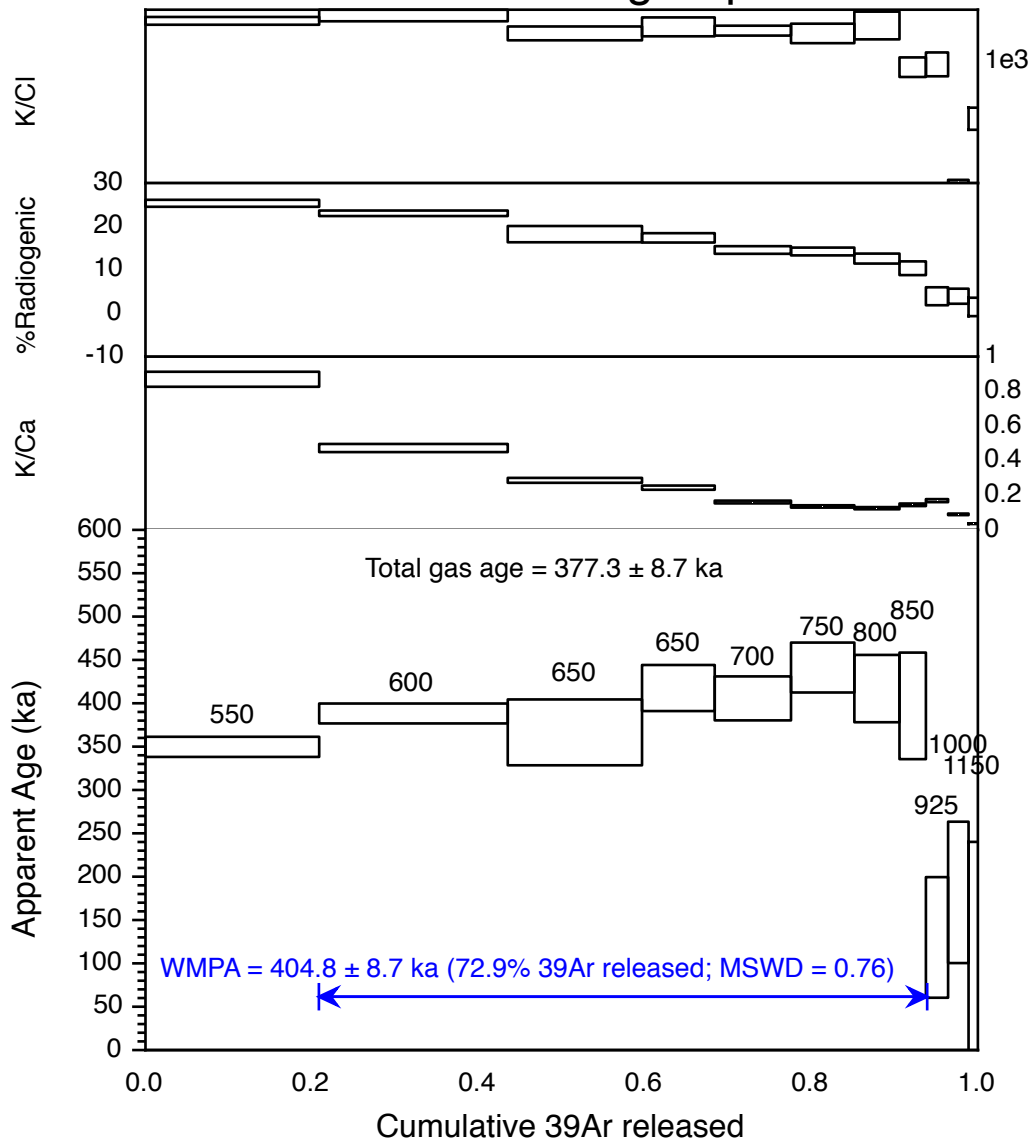

## 06LP42 Andesite Isochron

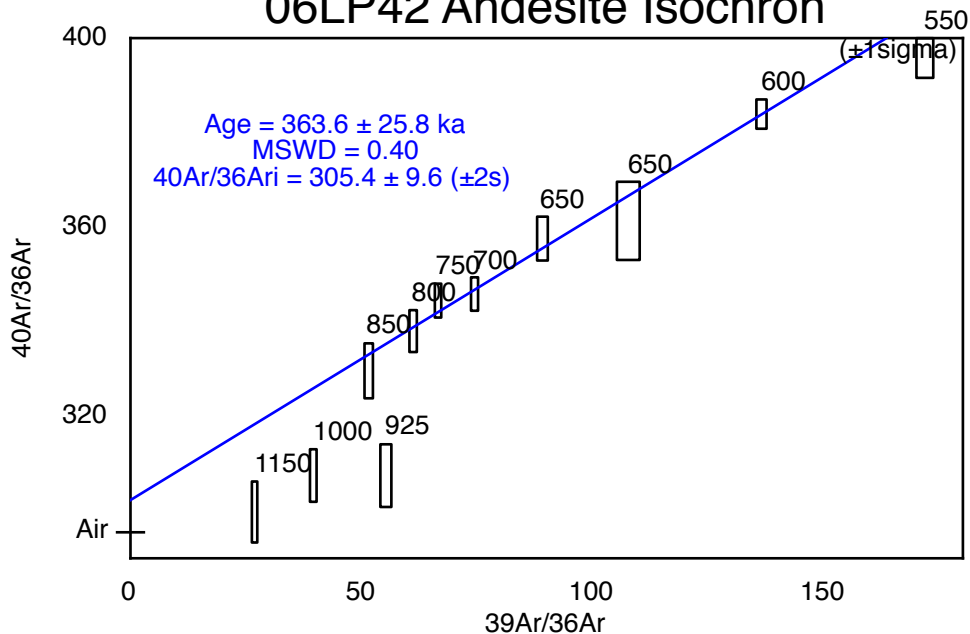



# 07LP36 Dacite Age Spectrum

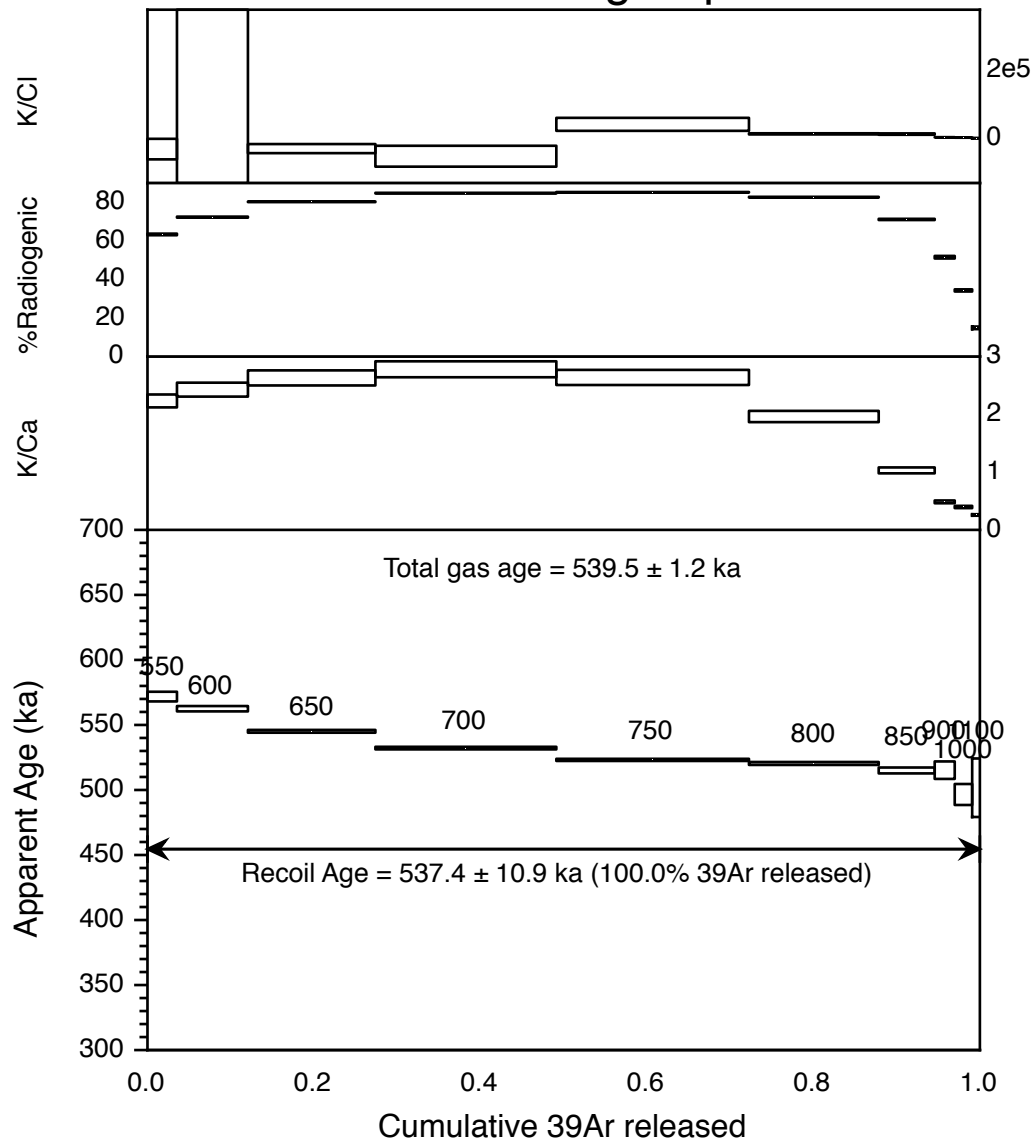

## 07LP36 Dacite Isochron

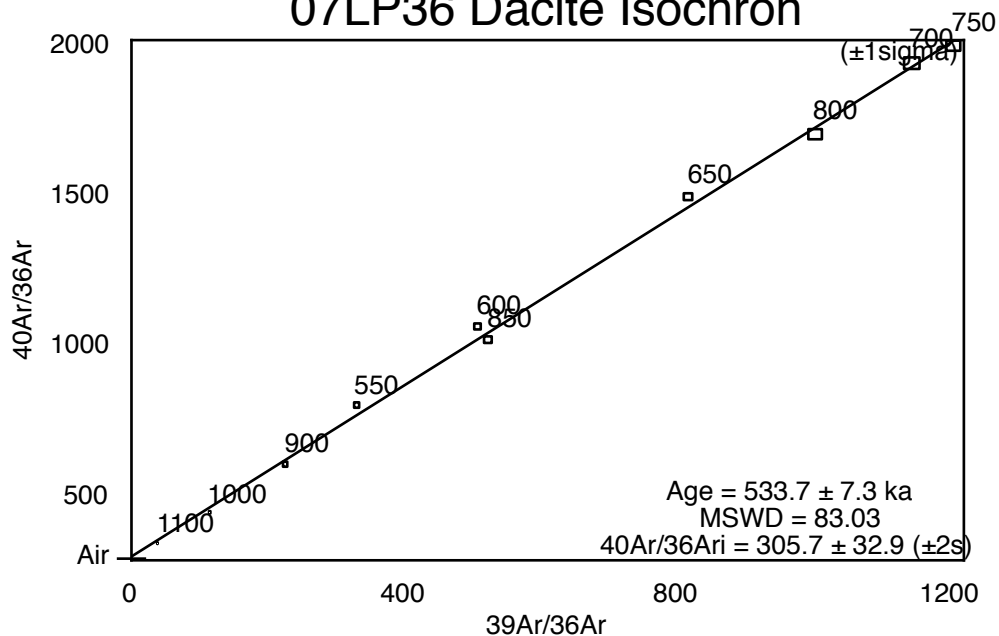

# 07-LP-37 Dacite Age Spectrum

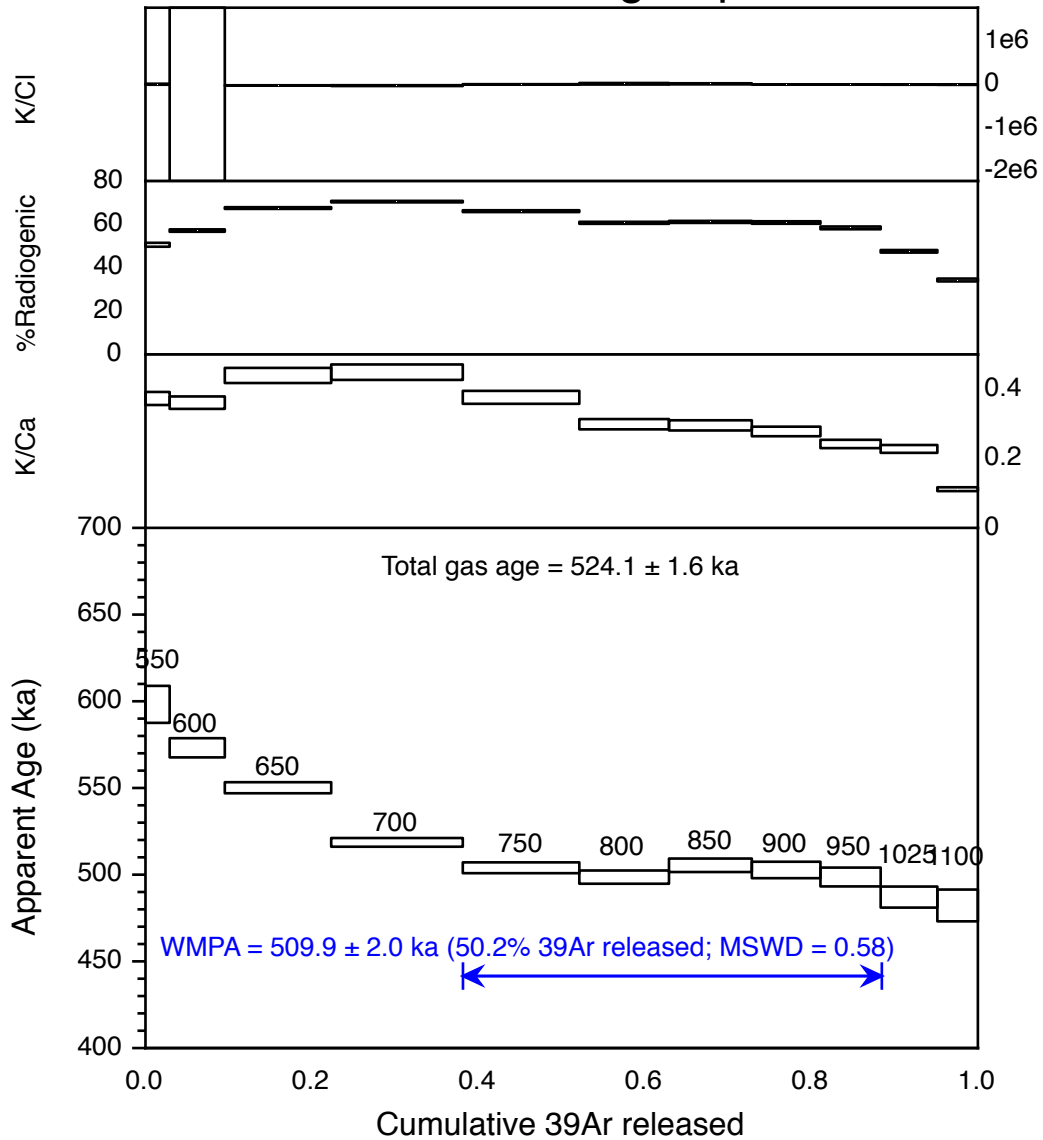

## 07-LP-37 Dacite Isochron

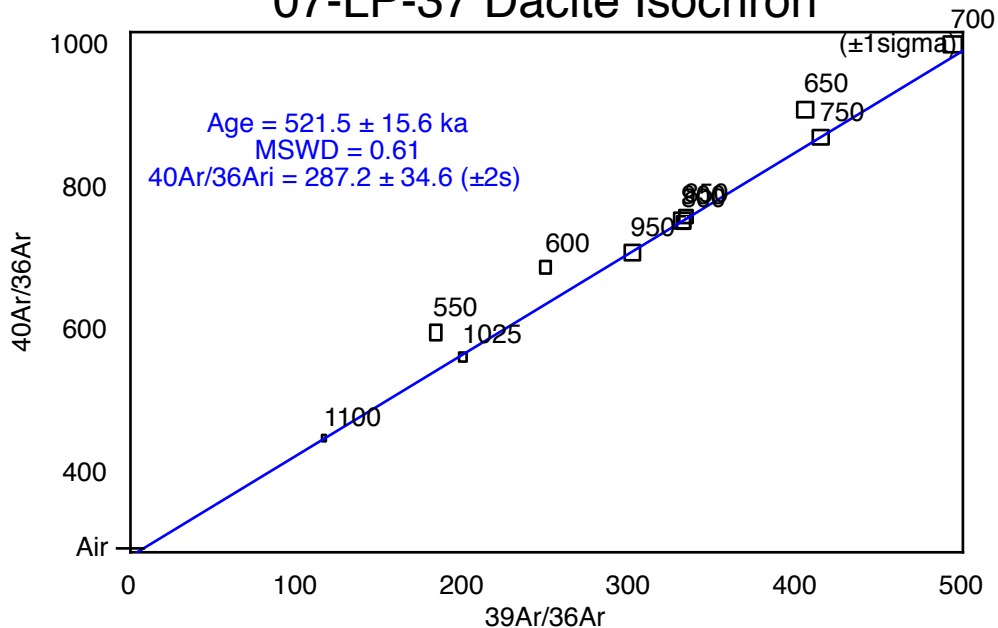

# 07-LP-63 Dacite Age Spectrum

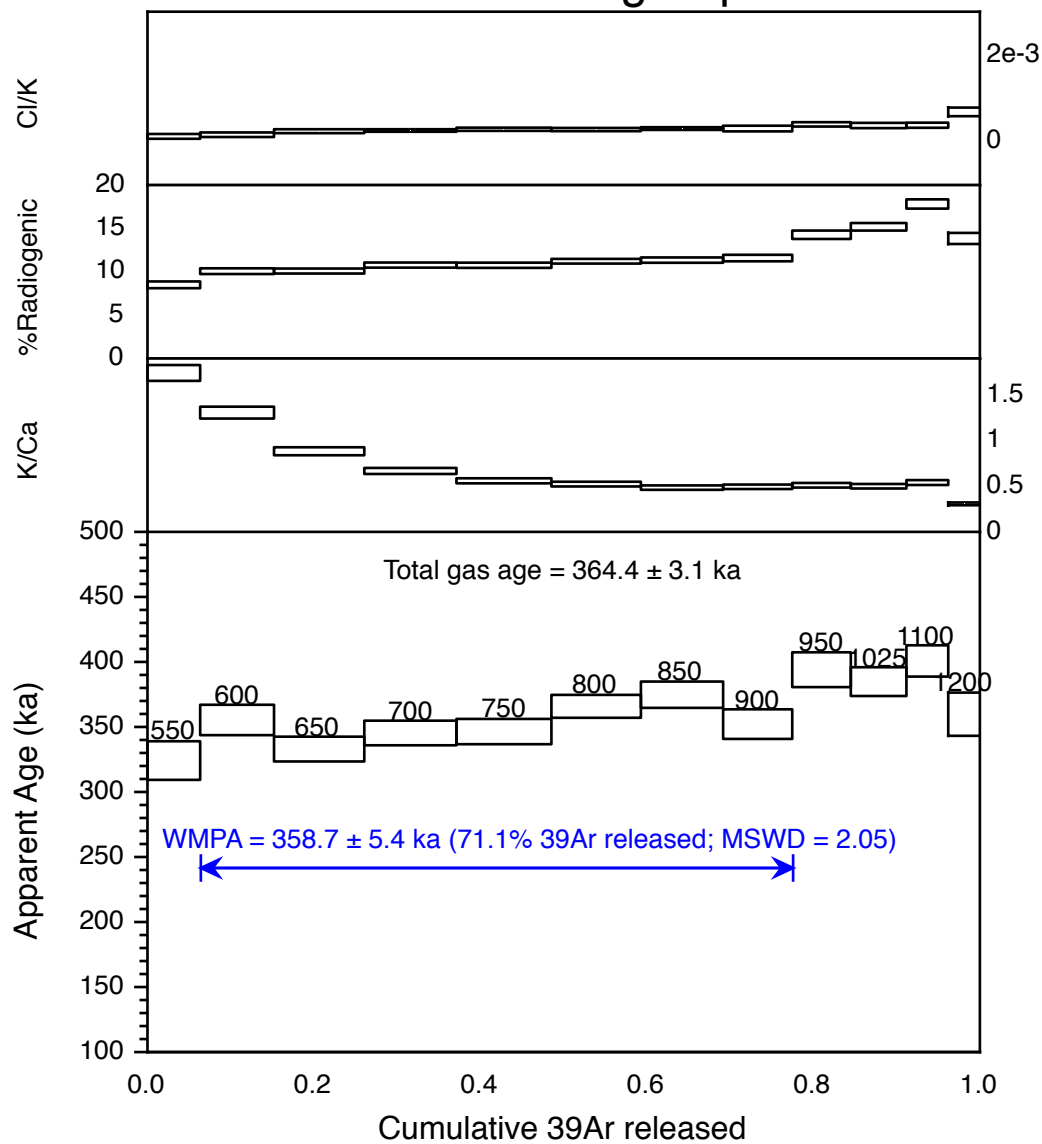

## 07-LP-63 Dacite Isochron

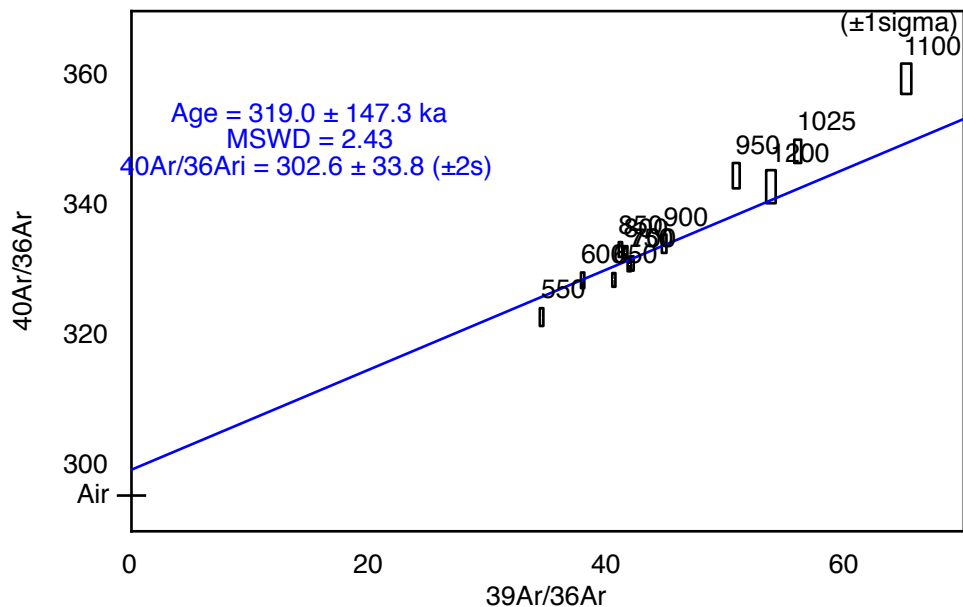

# 07-LP-80 Basalt Age Spectrum

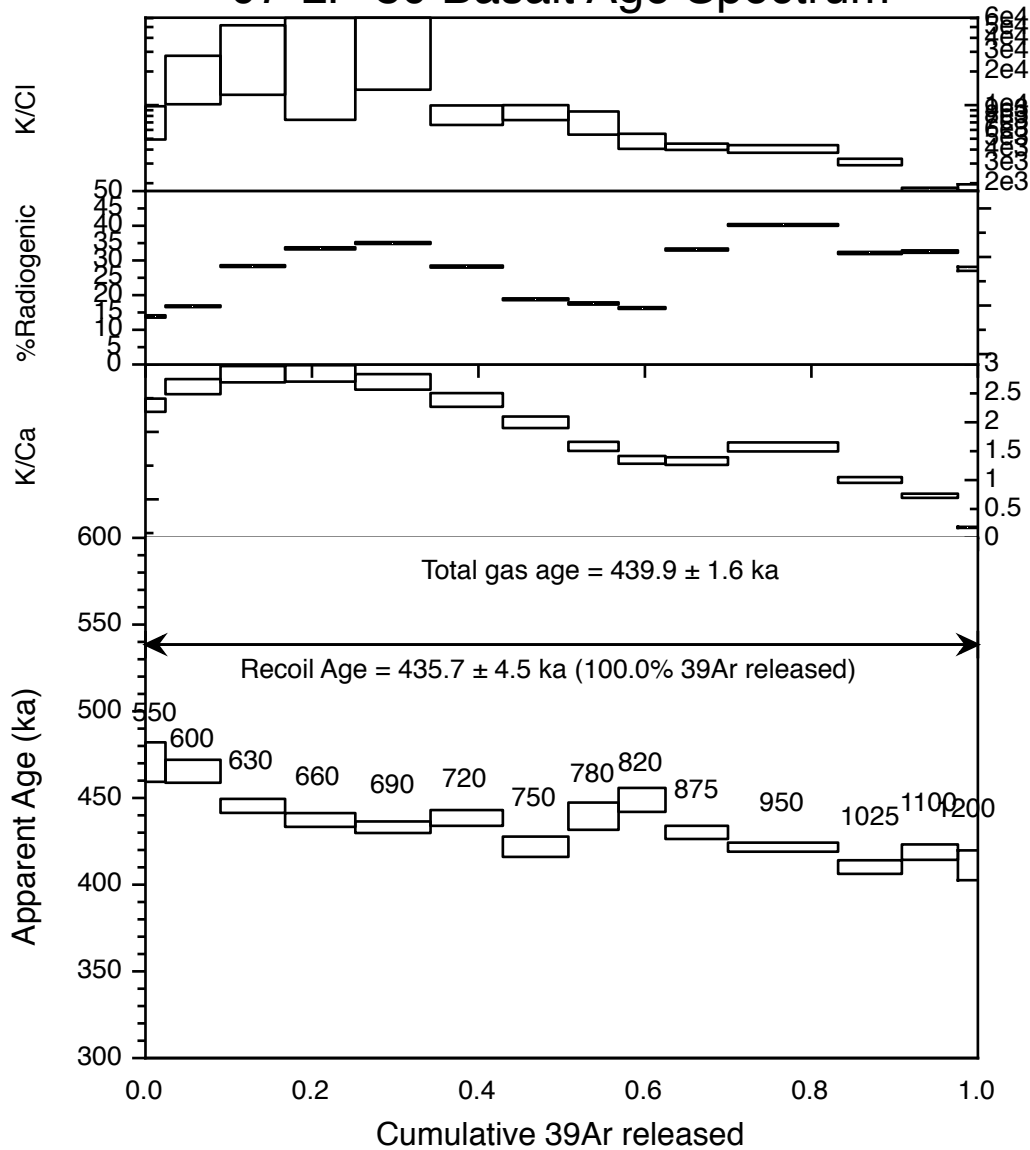

## 07-LP-80 Basalt Isochron

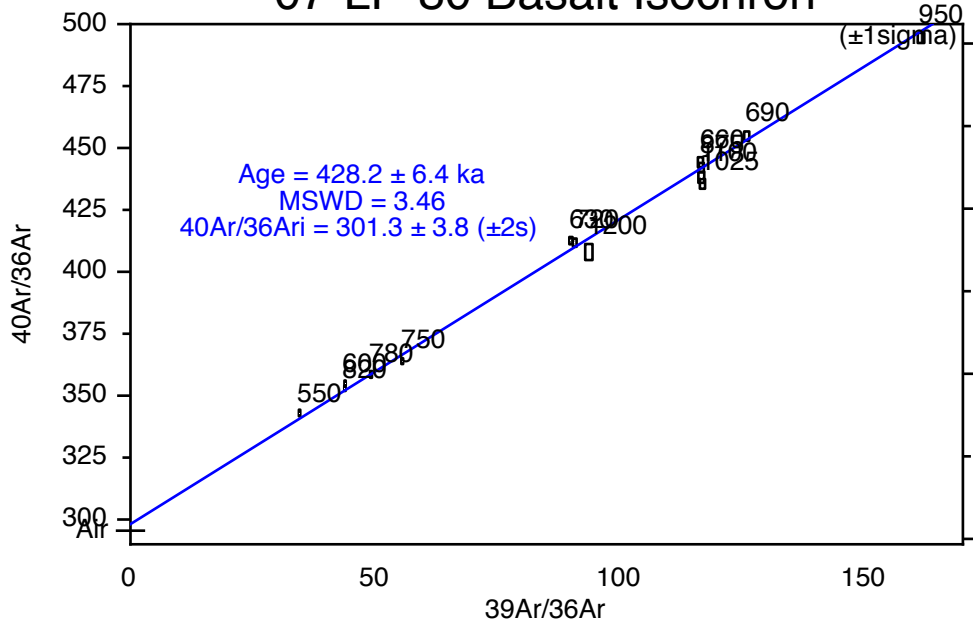

# 07-LP-80 Plagioclase Age Spectrum

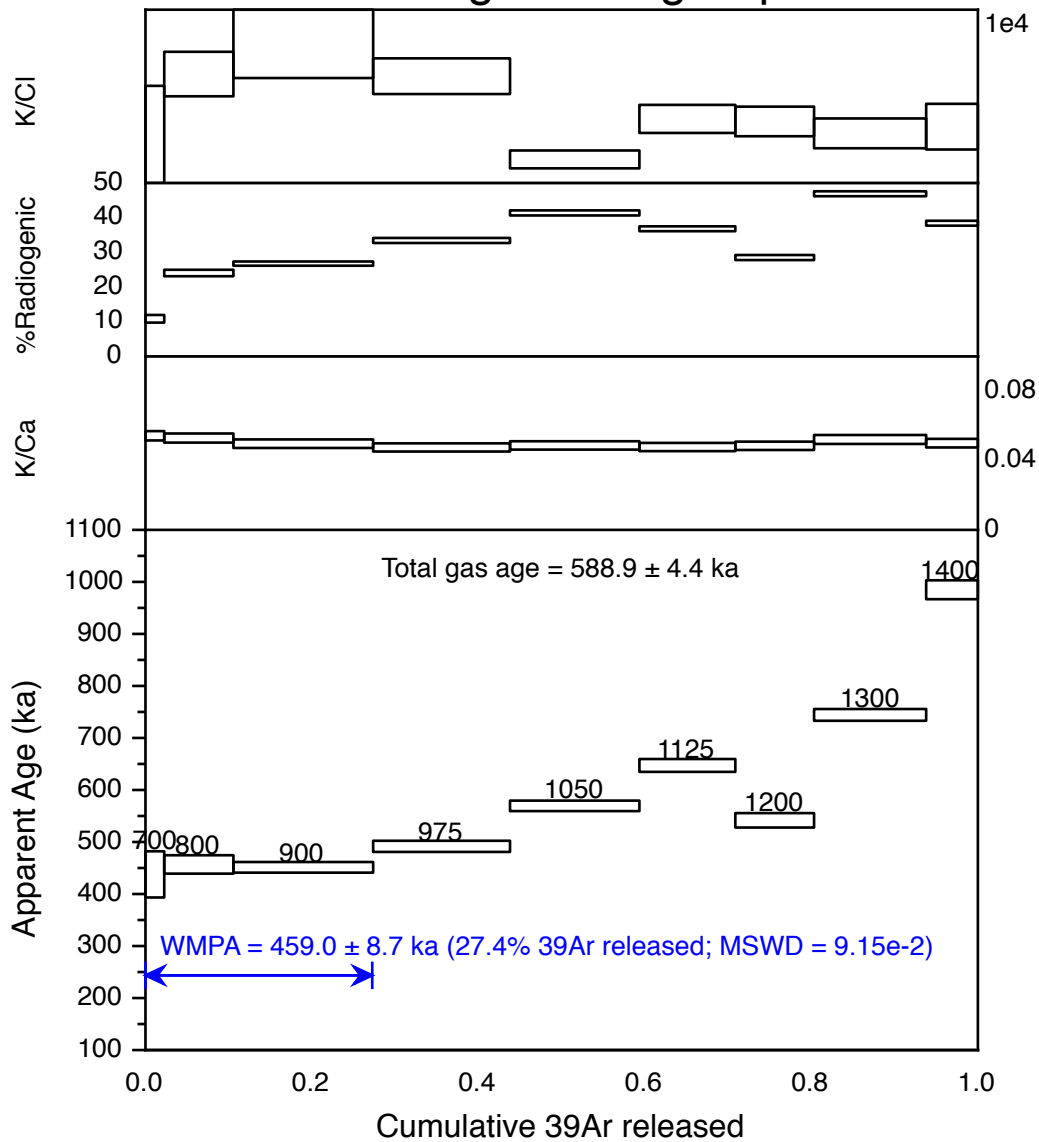

## 07-LP-80 Plagioclase Isochron

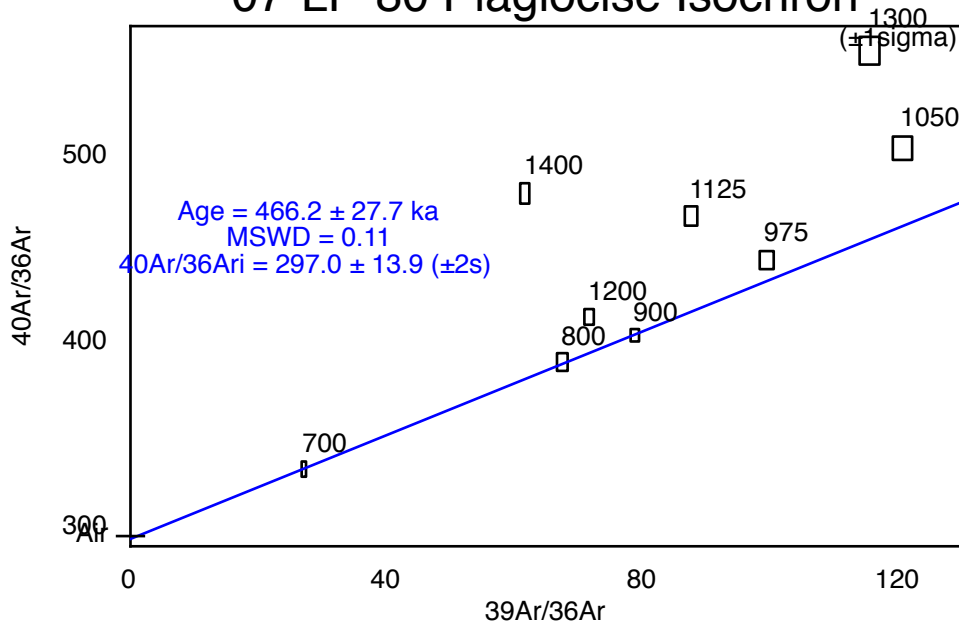

# 07-LP-104 Andesite Age Spectrum

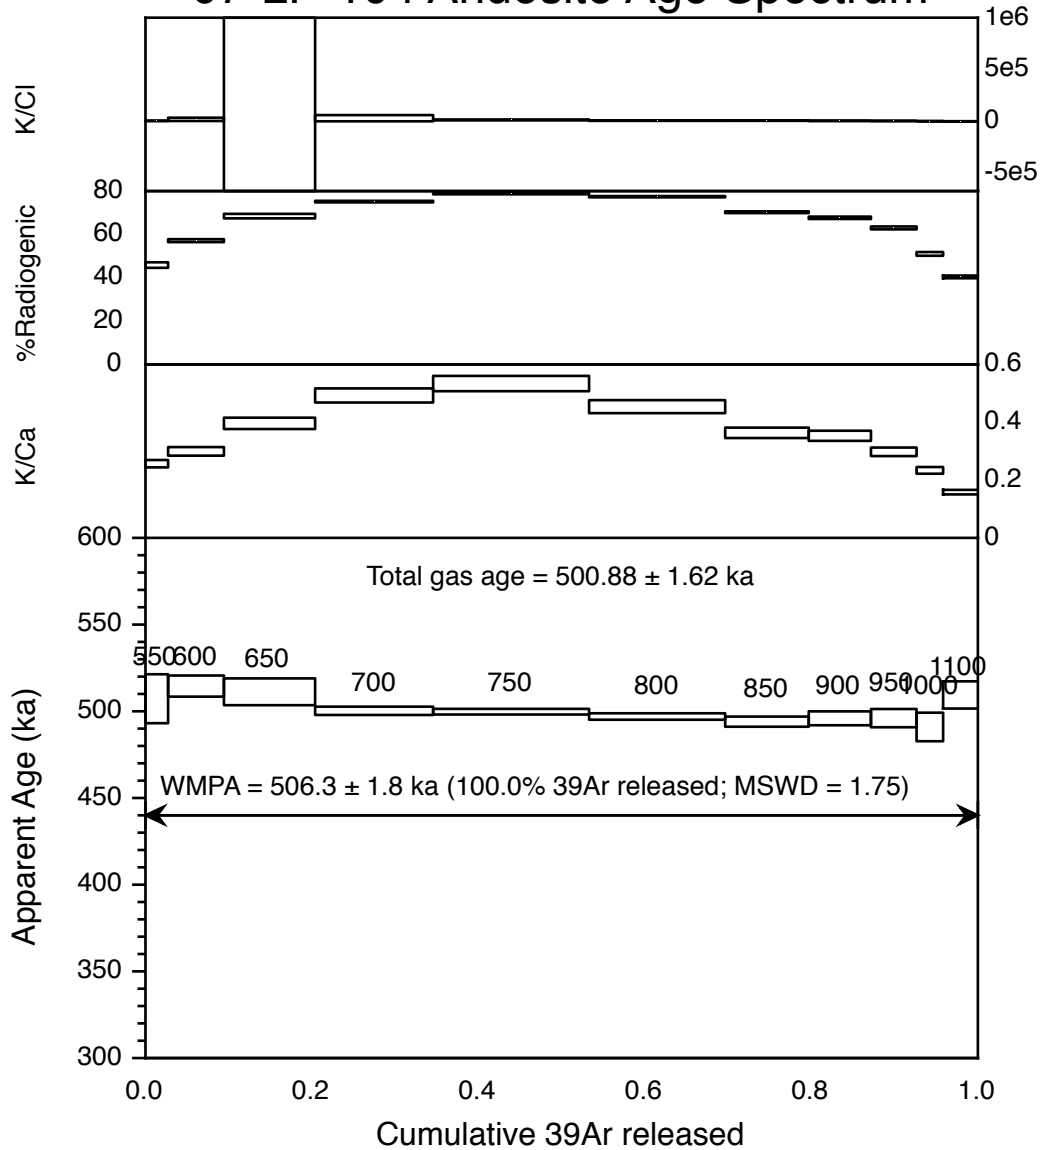

## 07-LP-104 Andesite Isochron

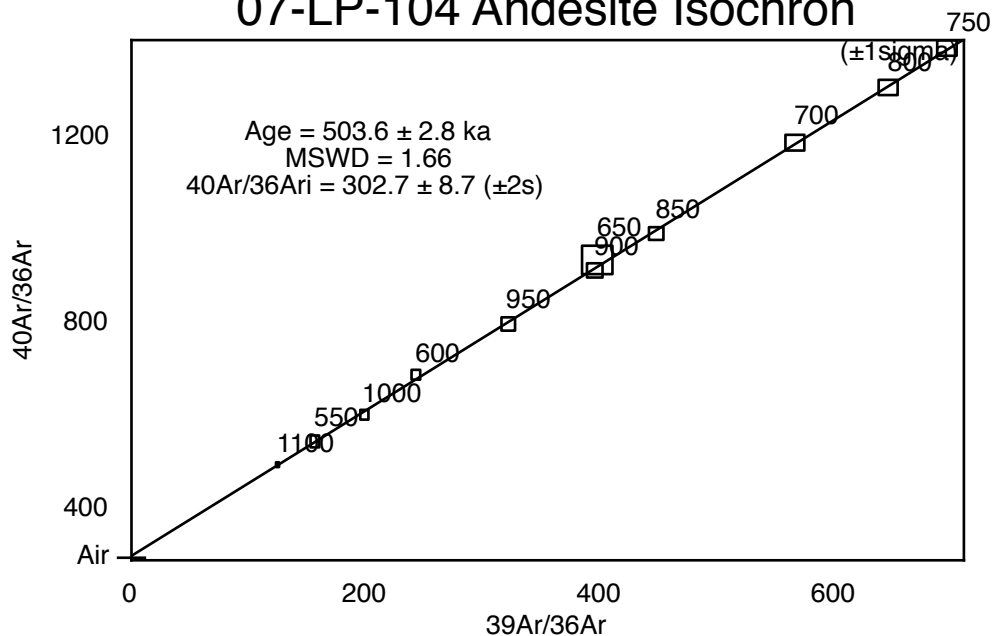

# LC86-899 Andesite Age Spectrum

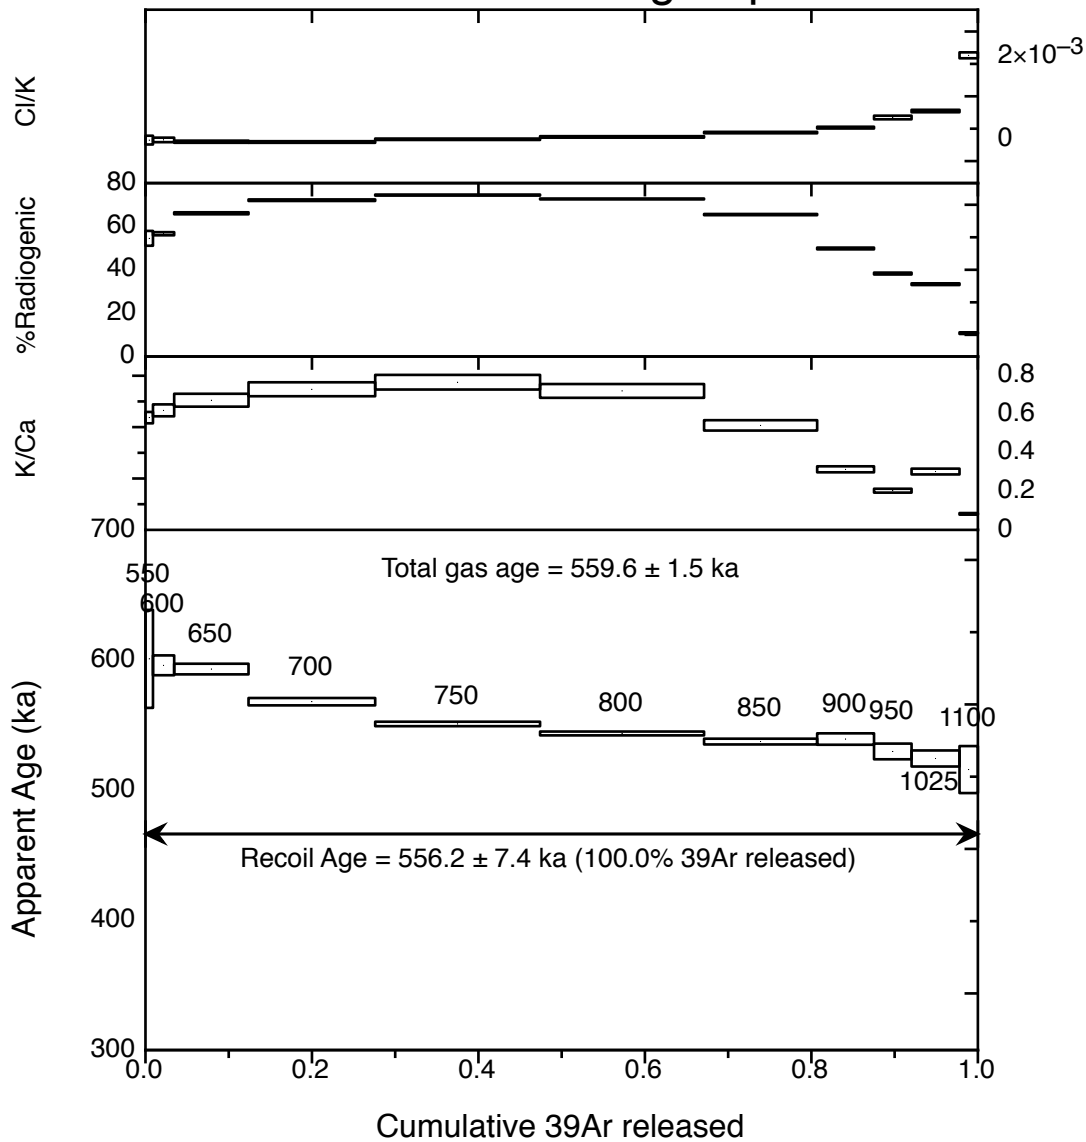

# LC86-899 Andesite Isochron

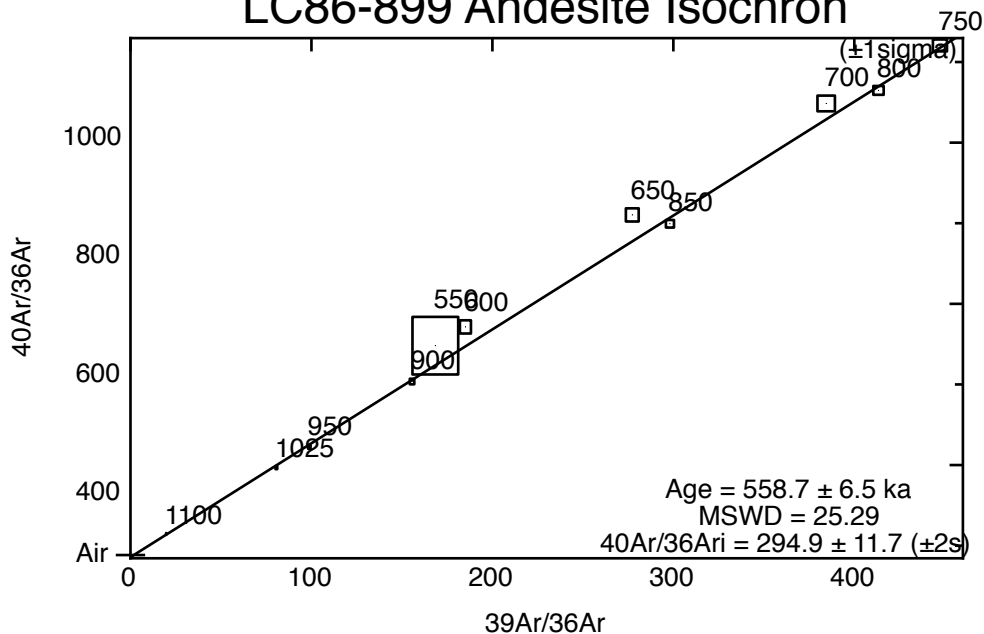

# 05-LP-60C(20-30) alunite Age Spectrum



## 05-LP-60C(20-30) alunite Isochron

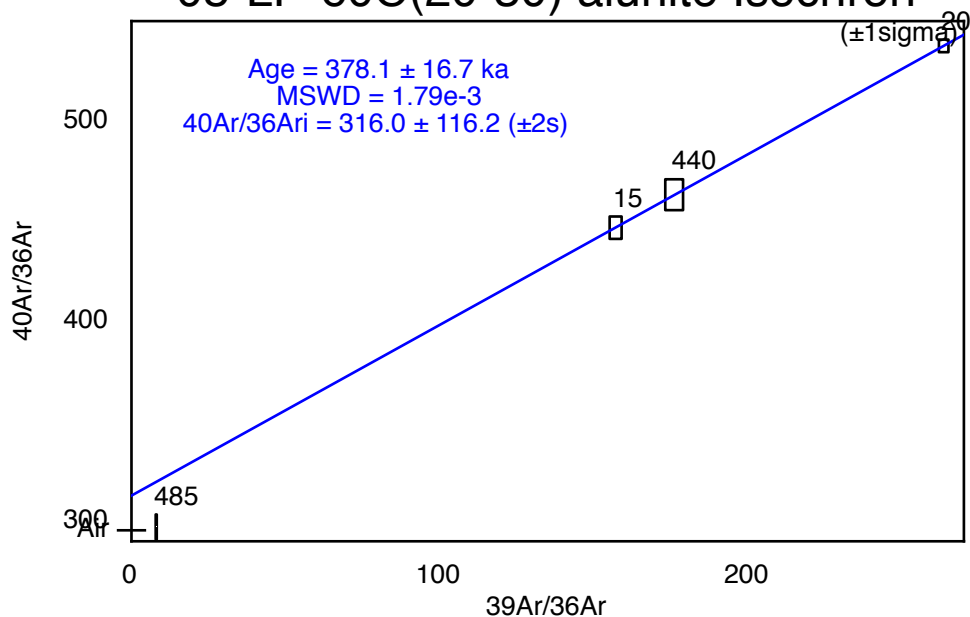



# 03-LP-42 Alunite Age Spectrum

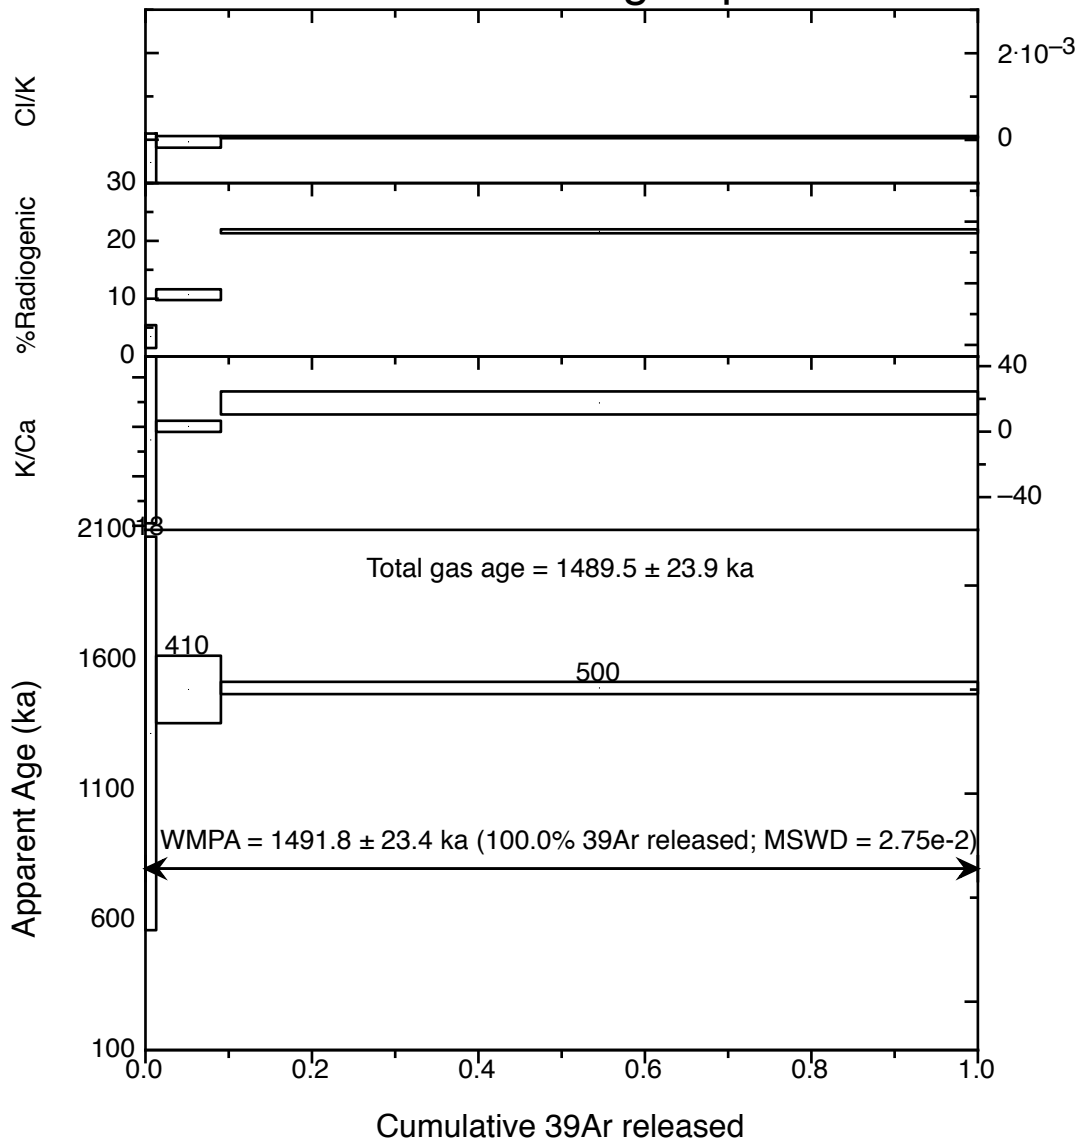

## 03-LP-42 Alunite Isochron

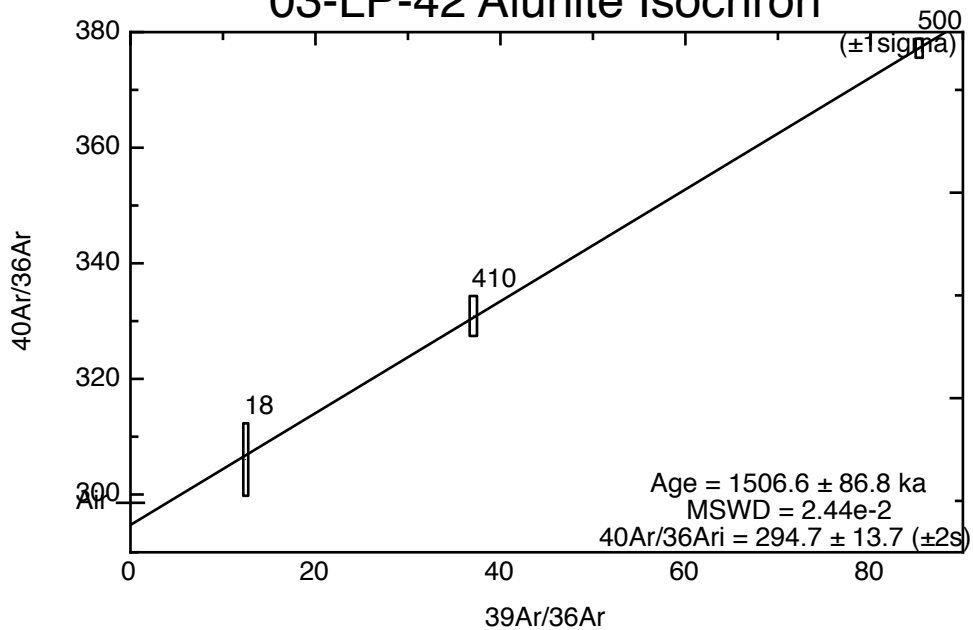

# 04-LP-18 Alunite Age Spectrum

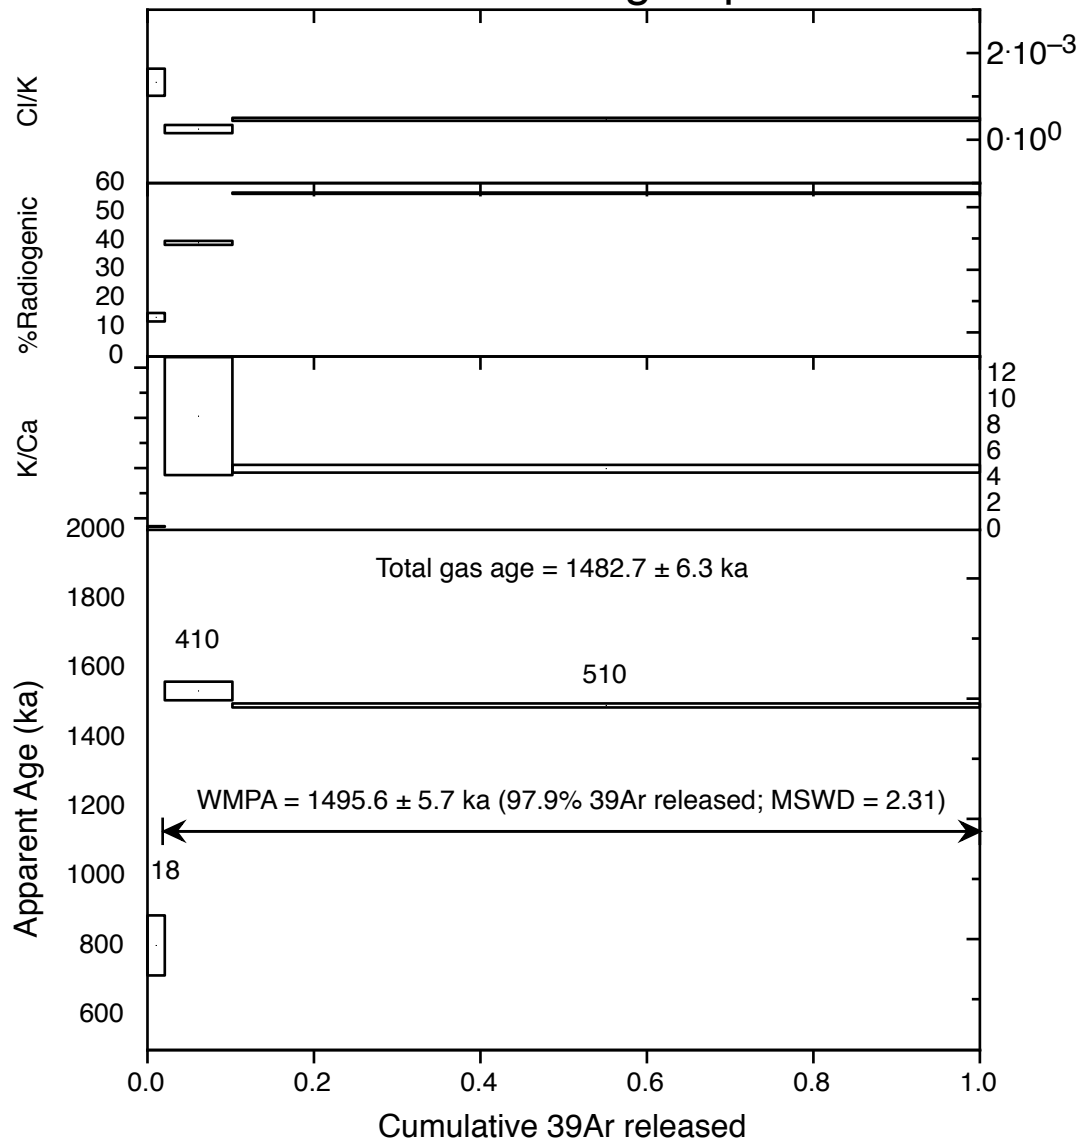

## 04-LP-18 Alunite Isochron

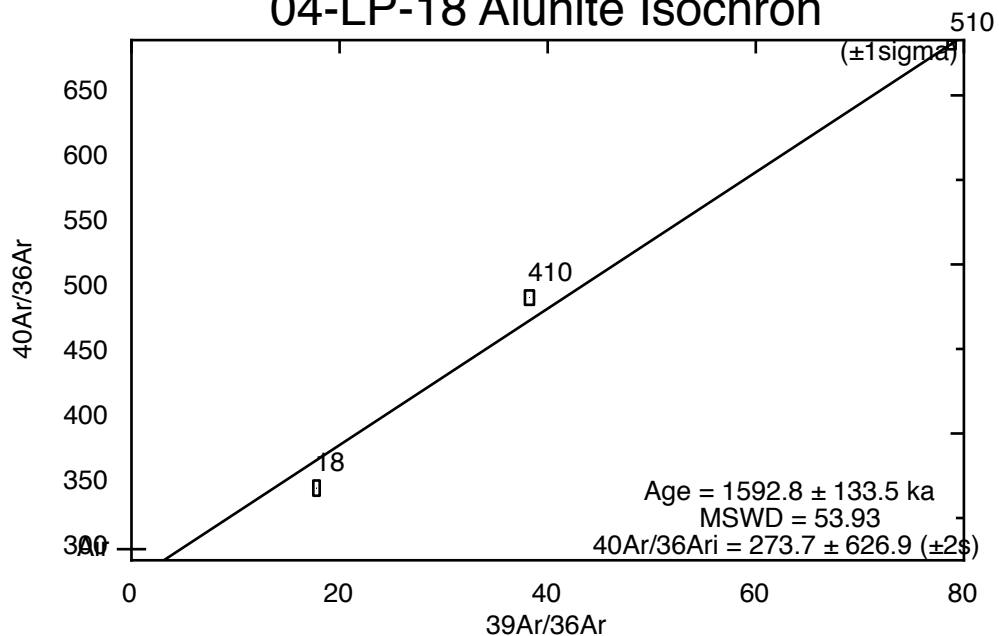

# 04-LP-111 Alunite Age Spectrum

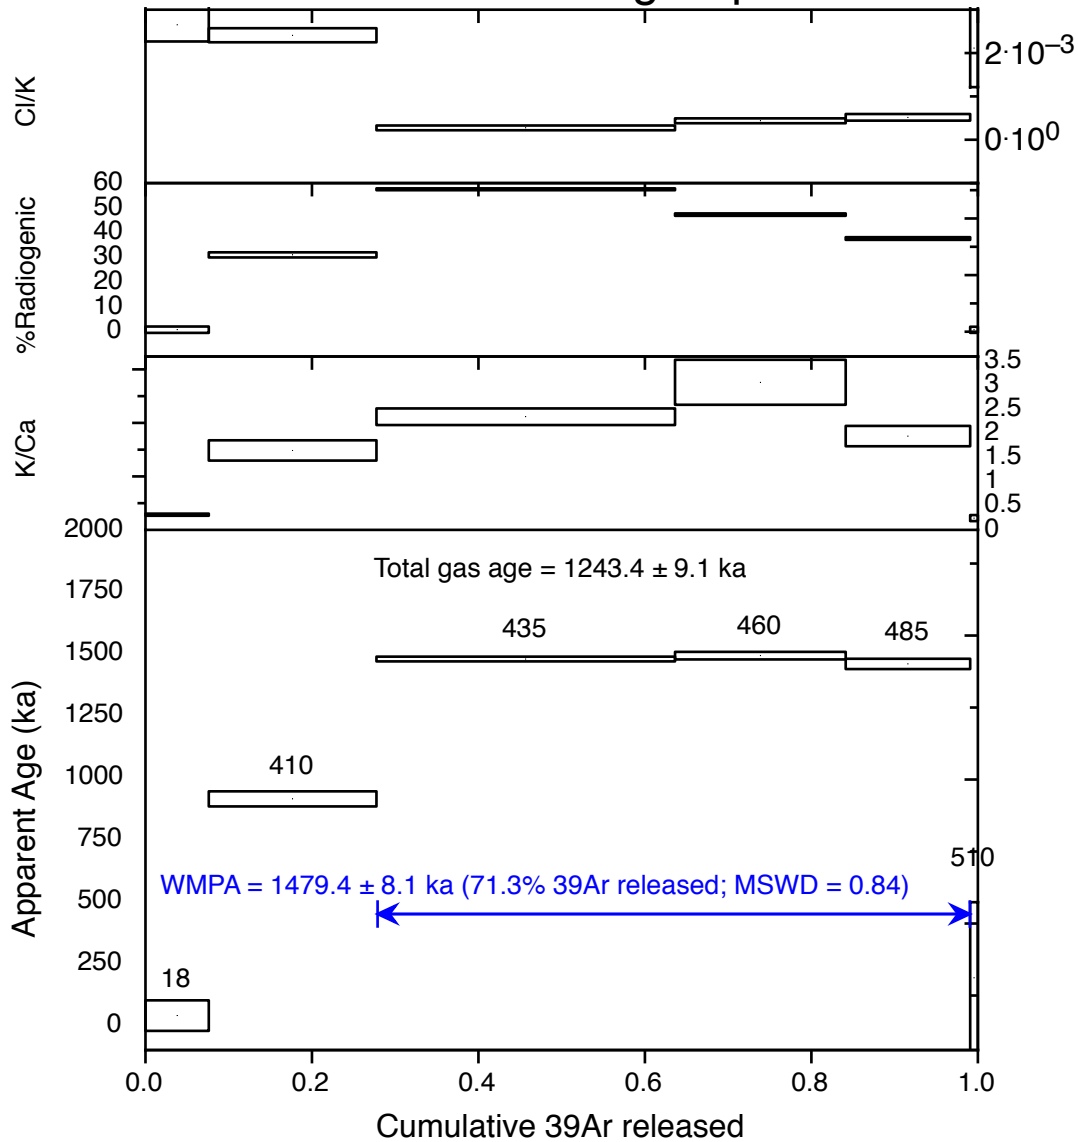

## 04-LP-111 Alunite Isochron

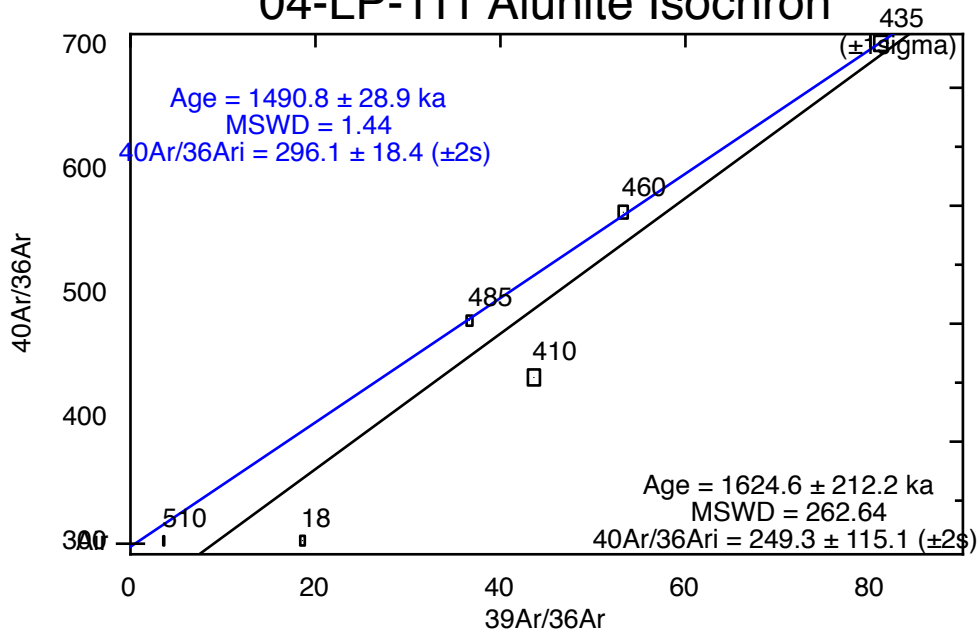

# 05-LP-110 Andesite Age Spectrum

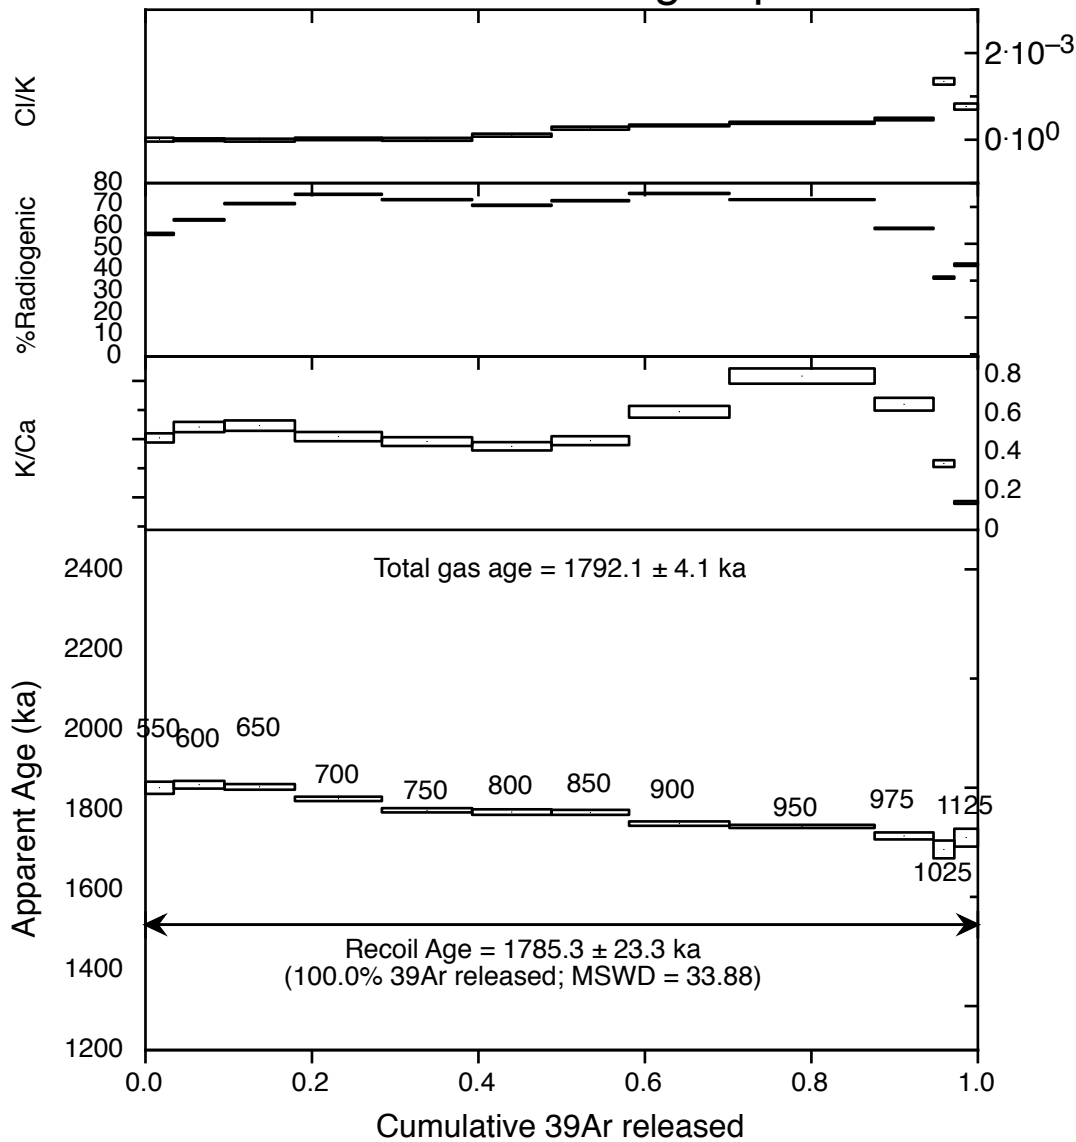

## 05-LP-110 Andesite Isochron

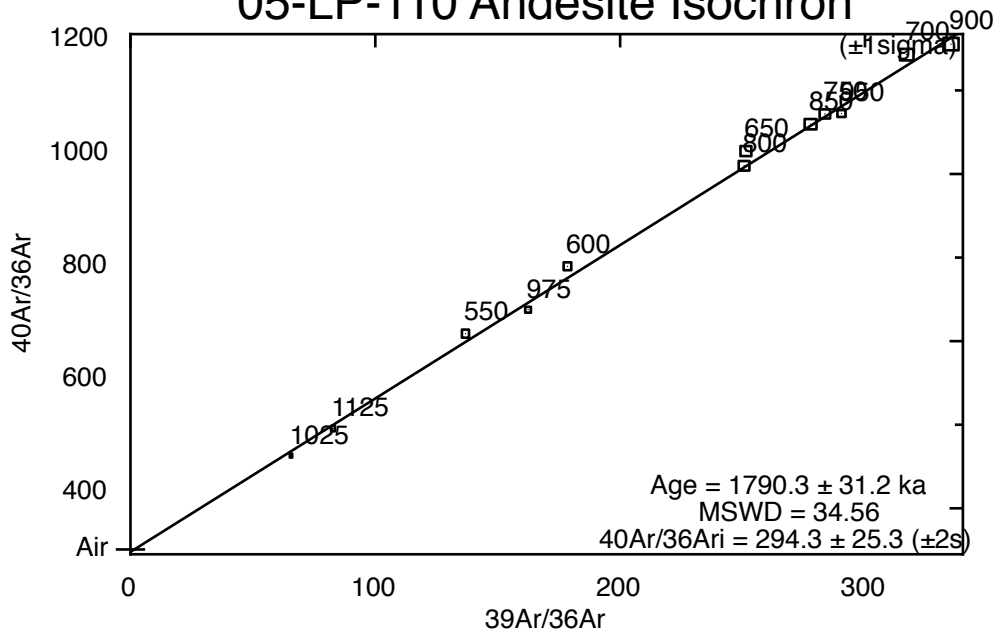

# 05LP115 Dacite Age Spectrum

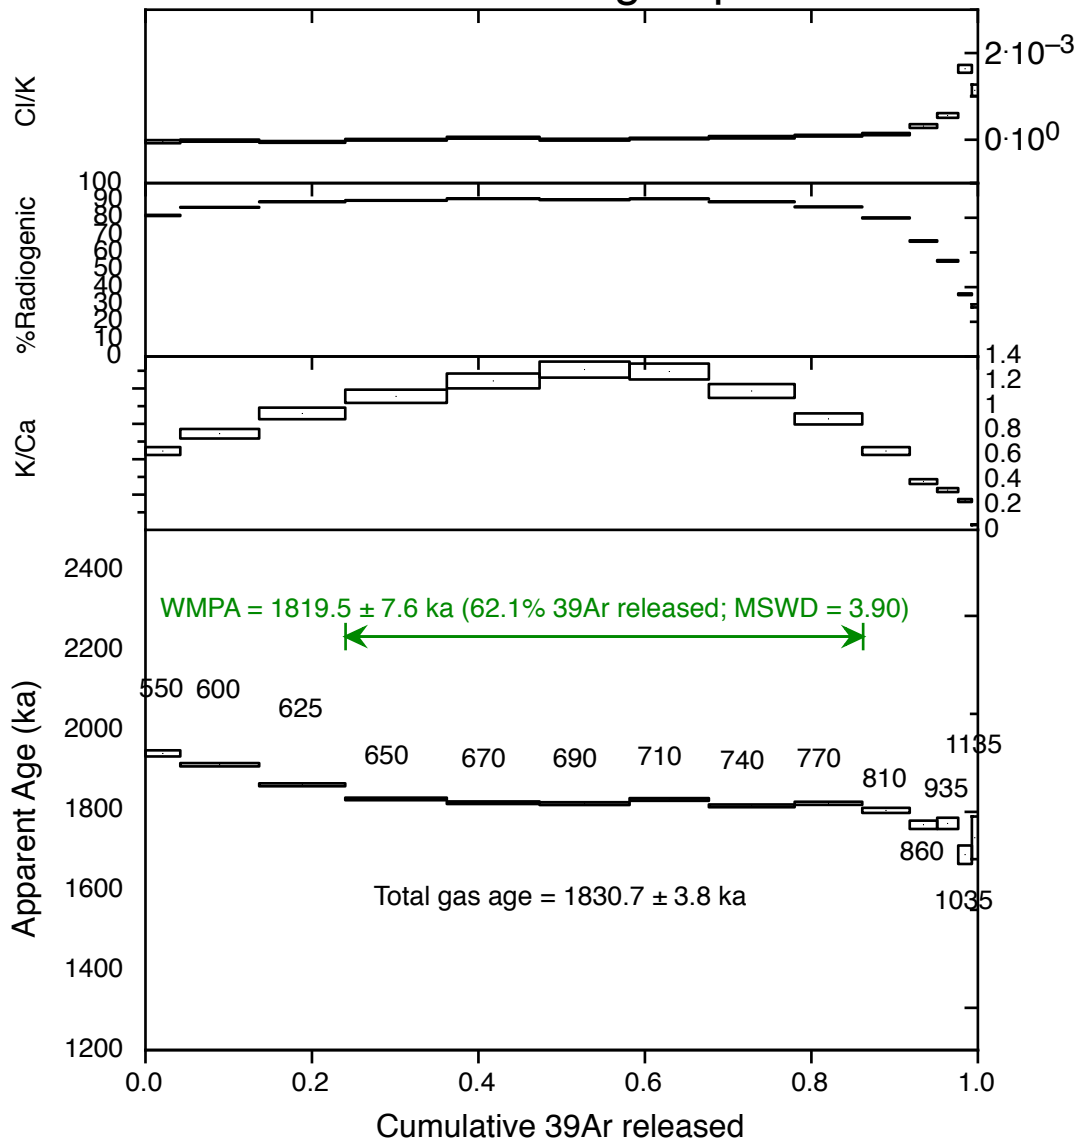

# 05LP115 Dacite Isochron

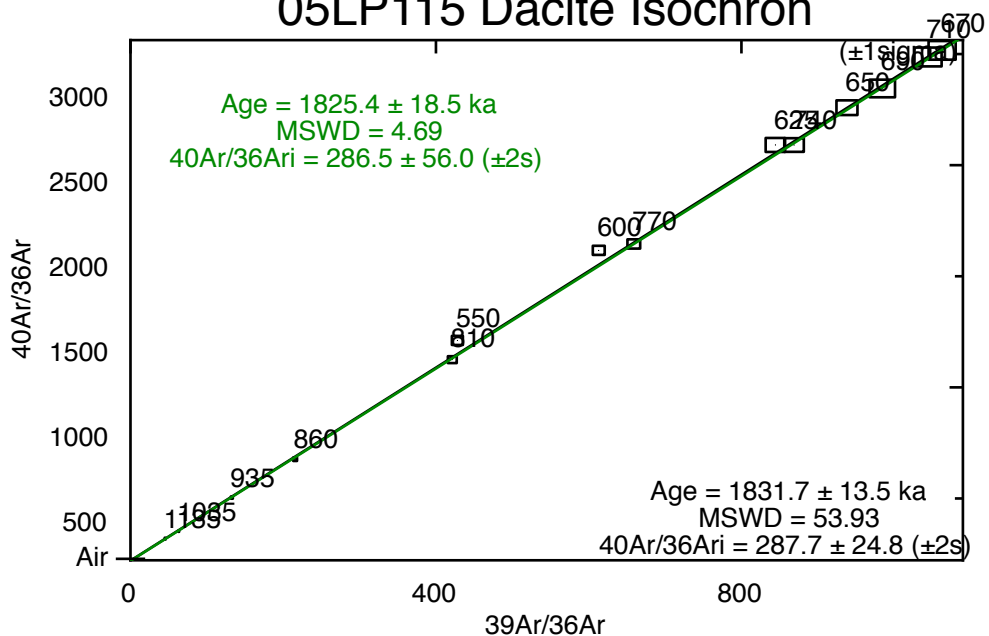

# 05LP116 Andesite Age Spectrum

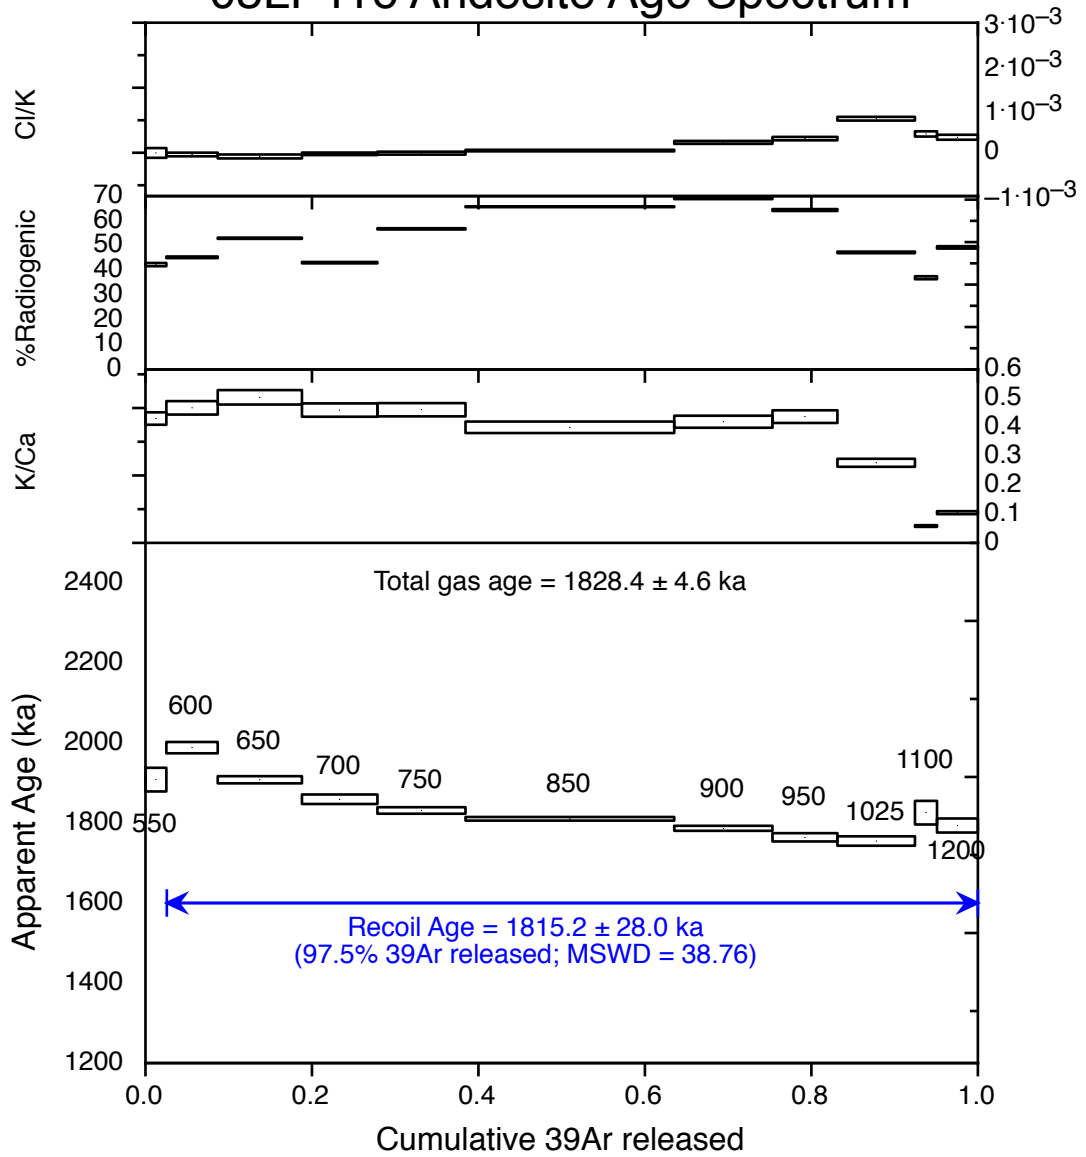

## 05LP116 Andesite Isochron

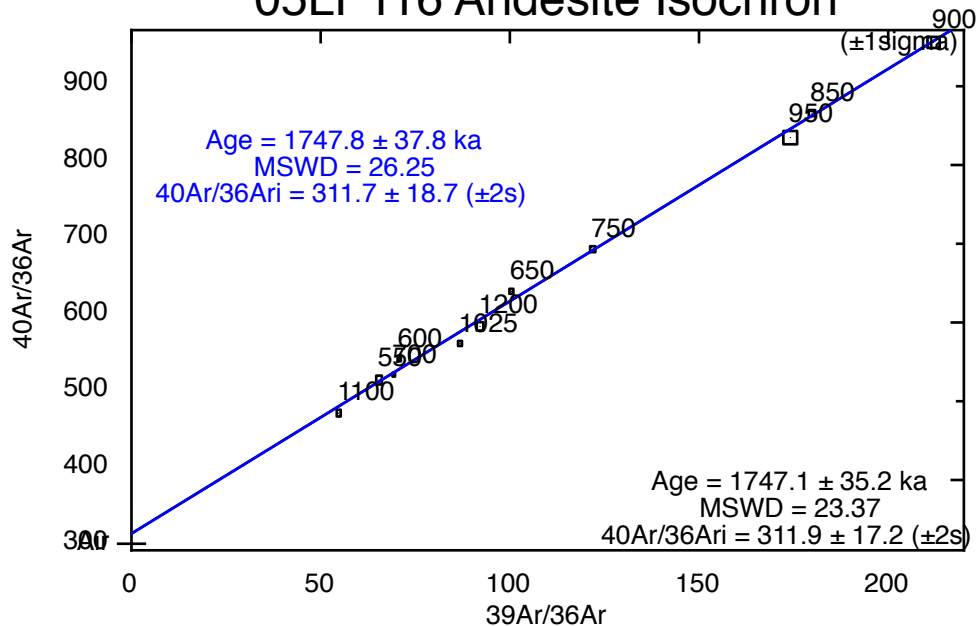

# 06LP45 rhyodacite Age Spectrum

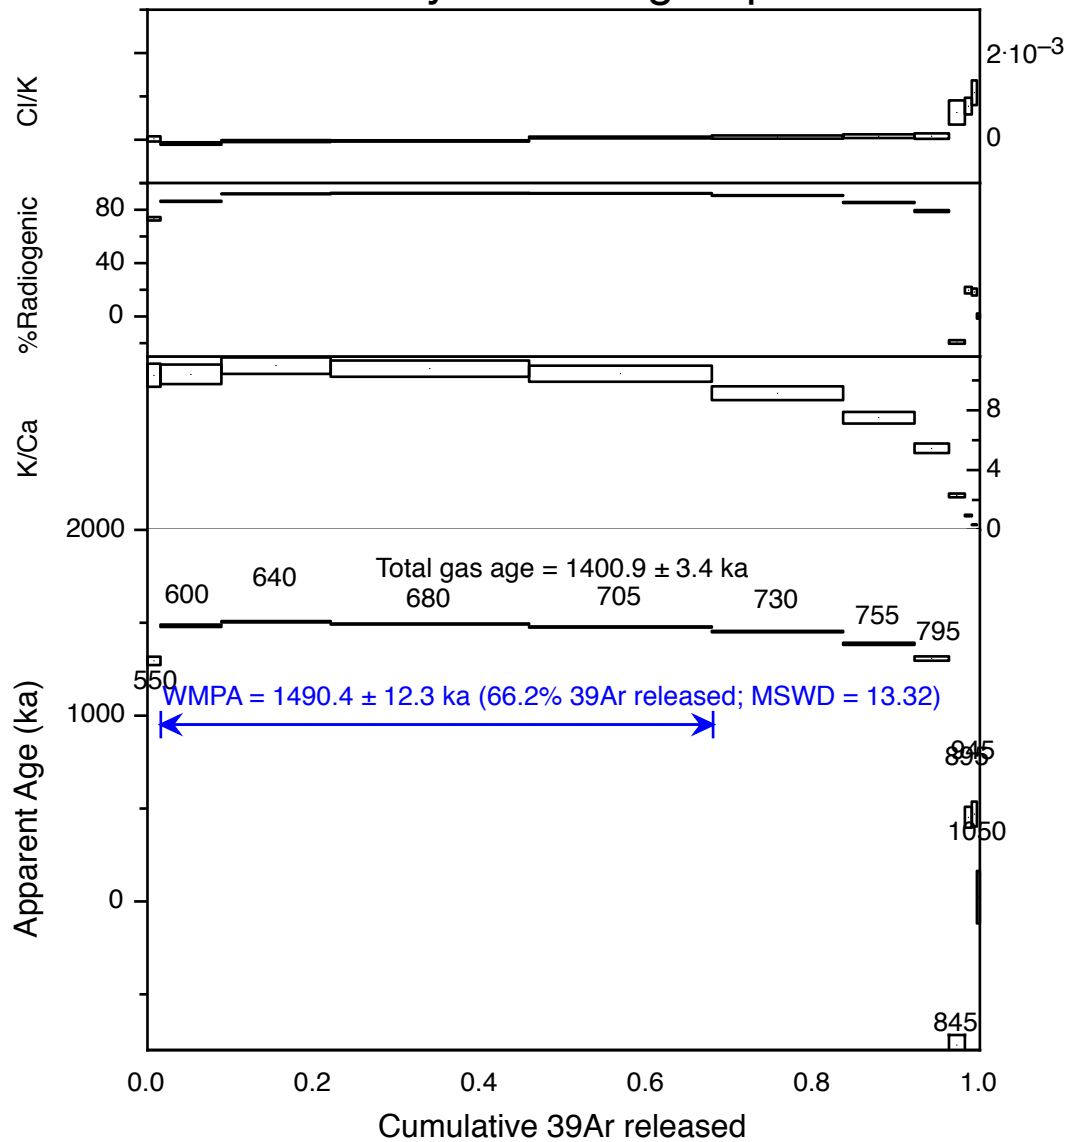

## 06LP45 rhyodacite Isochron

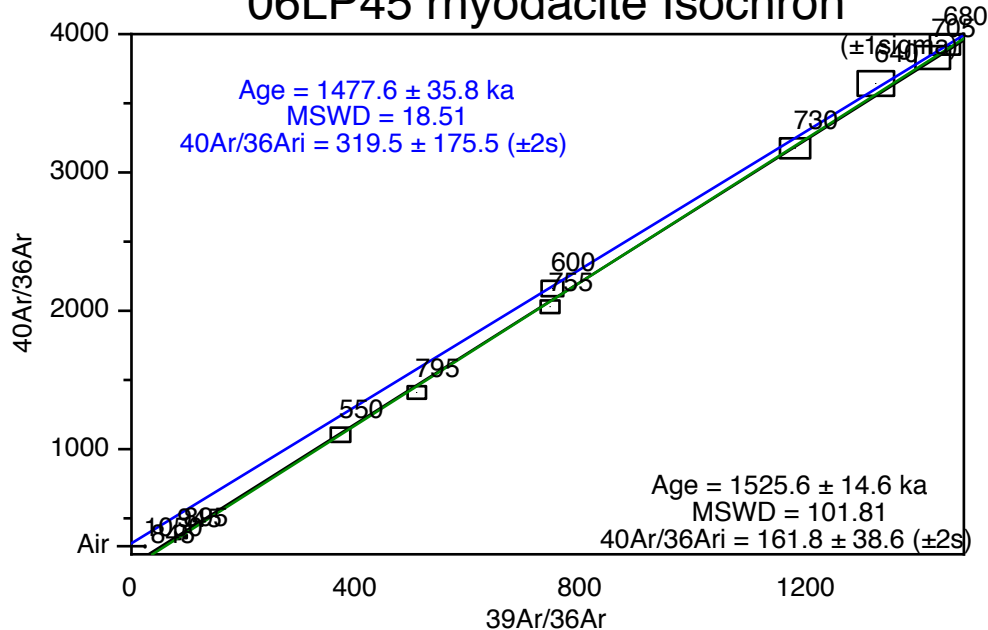

# 06LP46 rhyodacite Age Spectrum

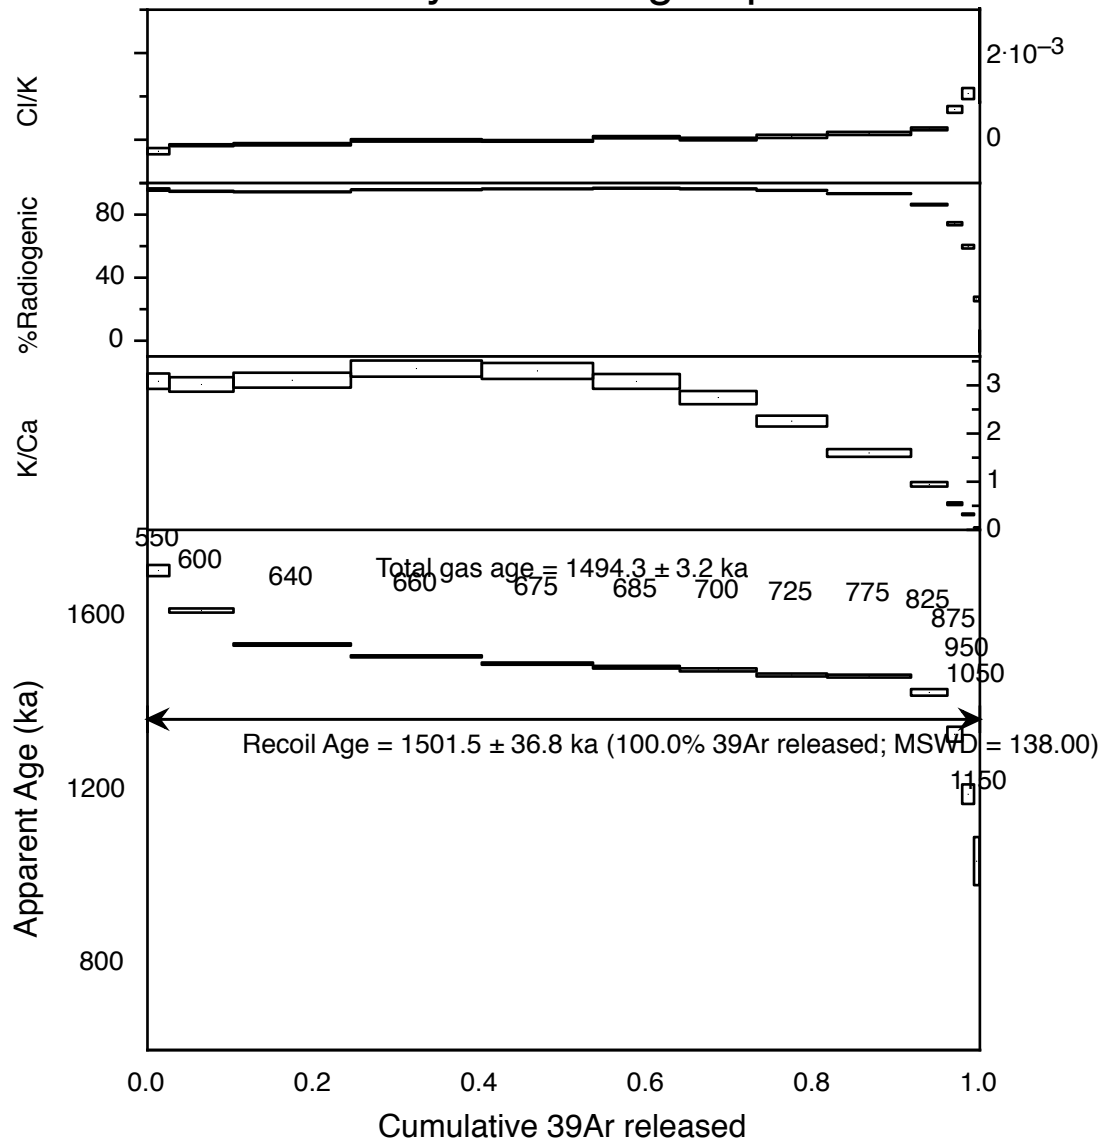

## 06LP46 rhyodacite Isochron

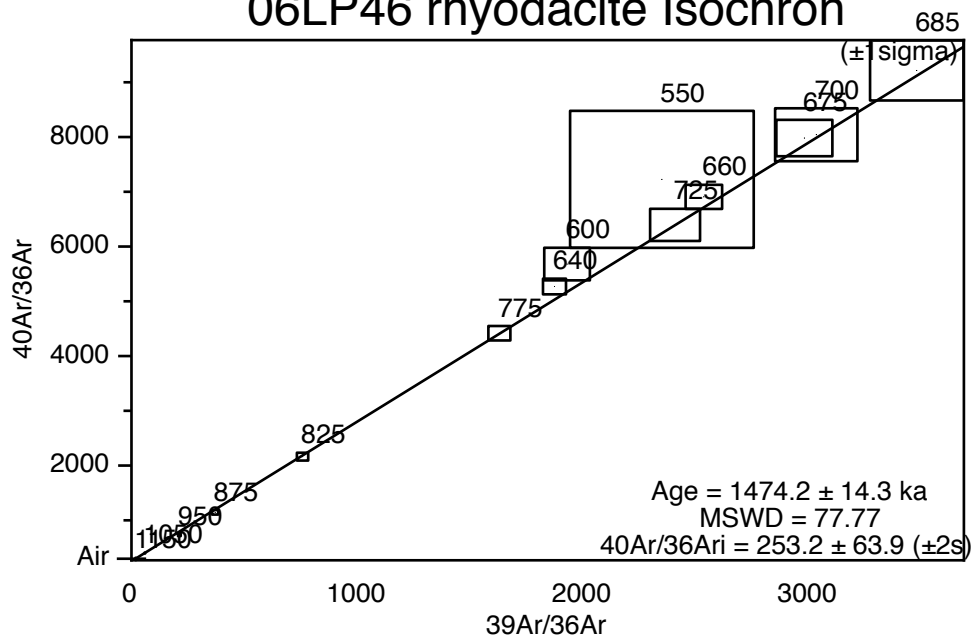

Supplement: Supplementary file 1 [file 22411632]
